# Supplementary material for: Zeylleucapenoids A-D, Highly Oxygenated Diterpenoids with Anti-inflammatory Activity from <em><i>Leucas zeylanica</i></em>
Source: Preprints.org preprint supplement (doi:10.20944/preprints202305.0651.v1), 2023-05-09
Supplement: Supplementary file 1 [file supplementary]

## SUPPLEMENTARY MATERIAL

### Zeylleucapenoids A–D, Highly Oxygenated Diterpenoids with Anti-inflammatory Activity from *Leucas zeylanica*

Ting Zhao<sup>†,a,b</sup>, Xuan Zhang<sup>†,a,b</sup>, Xuhua Nong<sup>a,b</sup>, Xueming Zhou<sup>a,b</sup>, Ruru Chai<sup>a,b</sup>, Xiaobao Li<sup>a,b\*</sup> and Guangying Chen<sup>a,b\*</sup>

<sup>a</sup> Key Laboratory of Tropical Medicinal Resource Chemistry of Ministry of Education Hainan Normal University, Haikou, Hainan 571158, China

<sup>b</sup> Key Laboratory of Tropical Medicinal Plant Chemistry of Hainan Province, College of Chemistry and Chemical Engineering, Hainan Normal University, Haikou, Hainan 571158, China

<sup>†</sup> These authors contributed equally to this work.

#### Abstract

Four previously undescribed highly oxygenated diterpenoids (**1–4**), zeylleucapenoids A–D, characterized by halimane and labdane skeletons, were isolated from the aerial parts of *Leucas zeylanica*. Their structures were elucidated primarily by NMR experiments. The absolute configuration of **1** was established by X-ray crystallographic analysis, whereas those for **2–4** were assigned by quantum-chemical calculations. Zeylleucapenoid D, showed significant anti-inflammatory activity and obviously inhibited pro-inflammatory cytokines TNF- $\alpha$  and IL-6 in a dose-dependent manner with nontoxic activity for zebrafish embryo. Furthermore, by regulation of the expression of inducible nitric oxide synthase (iNOS) and cyclooxygenase-2 (COX-2) proteins as well as their binding interactions with the two proteins via Western blotting and molecular docking to explore the possible mechanism.

#### Keywords

*Leucas zeylanica*; Highly oxygenated; Diterpenoids; Anti-inflammatory activity; Molecular docking; Zebrafish model

## The list of Content

| No. | Content                                                                                                                                                                                                                                                 | Page |
|-----|---------------------------------------------------------------------------------------------------------------------------------------------------------------------------------------------------------------------------------------------------------|------|
| 1   | <b>Table S1</b> Crystal data and structure refinement for compound <b>1</b> authored.                                                                                                                                                                   | 1    |
| 2   | <b>Table S2</b> Fractional Atomic Coordinates ( $\times 10^4$ ) and Equivalent Isotropic Displacement Parameters ( $\text{\AA}^2 \times 10^3$ ) for compound <b>1</b> authored. Ueq is defined as 1/3 of of the trace of the orthogonalised UIJ tensor. | 2    |
| 3   | <b>Table S3</b> Anisotropic Displacement Parameters ( $\text{\AA}^2 \times 10^3$ ) for LE35113_A_ authored. The Anisotropic displacement factor exponent takes the form: $-2\pi 2[h2a*2U11+2hka*b*U12+\dots]$ .                                         | 3    |
| 4   | <b>Table S4</b> Bond Lengths for compound <b>1</b> authored.                                                                                                                                                                                            | 4    |
| 5   | <b>Table S5</b> Bond Angles for compound <b>1</b> authored.                                                                                                                                                                                             | 5    |
| 6   | <b>Table S6</b> Hydrogen Bonds for compound <b>1</b> authored.                                                                                                                                                                                          | 6    |
| 7   | <b>Table S7</b> Torsion Angles for compound <b>1</b> authored.                                                                                                                                                                                          | 6    |
| 8   | <b>Table S8</b> Hydrogen Atom Coordinates ( $\text{\AA} \times 10^4$ ) and Isotropic Displacement Parameters ( $\text{\AA}^2 \times 10^3$ ) for compound <b>1</b> authored.                                                                             | 7    |
| 9   | <b>Computational Section</b>                                                                                                                                                                                                                            | 8    |
| 10  | <b>Table S9</b> Energies of the dominative conformers of compound <b>1</b> .                                                                                                                                                                            | 8    |
| 11  | <b>Table S10</b> Energies of the dominative conformers of compounds <b>2</b> and <b>3</b> .                                                                                                                                                             | 9    |
| 12  | <b>Table S11</b> Calculated and measured OR values of compounds <b>2</b> and <b>3</b> at different wavelengths.                                                                                                                                         | 10   |
| 13  | <b>Table S12</b> The docking pockets                                                                                                                                                                                                                    | 11   |
| 14  | <b>Figure S1</b> The UV Spectrum of Compound <b>1</b> .                                                                                                                                                                                                 | 11   |
| 15  | <b>Figure S2</b> The (+)-HRMS(ESI) Spectroscopic Data of Compound <b>1</b> .                                                                                                                                                                            | 11   |
| 16  | <b>Figure S3</b> The $^1\text{H}$ NMR Spectrum of Compound <b>1</b> in $\text{CD}_3\text{OD}$ .                                                                                                                                                         | 12   |
| 17  | <b>Figure S4</b> The $^{13}\text{C}$ NMR Spectrum of Compound <b>1</b> in $\text{CD}_3\text{OD}$ .                                                                                                                                                      | 12   |
| 18  | <b>Figure S5</b> The DEPT Spectrum of Compound <b>1</b> in $\text{CD}_3\text{OD}$ .                                                                                                                                                                     | 13   |
| 19  | <b>Figure S6</b> The HSQC Spectrum of Compound <b>1</b> in $\text{CD}_3\text{OD}$ .                                                                                                                                                                     | 13   |
| 20  | <b>Figure S7</b> The $^1\text{H}$ - $^1\text{H}$ COSY Spectrum of Compound <b>1</b> in $\text{CD}_3\text{OD}$ .                                                                                                                                         | 14   |
| 21  | <b>Figure S8</b> The HMBC Spectrum of Compound <b>1</b> in $\text{CD}_3\text{OD}$ .                                                                                                                                                                     | 14   |
| 22  | <b>Figure S9</b> The NOESY Spectrum of Compound <b>1</b> in $\text{CD}_3\text{OD}$ .                                                                                                                                                                    | 15   |
| 23  | <b>Figure S10</b> The UV Spectrum of Compound <b>2</b> .                                                                                                                                                                                                | 15   |
| 24  | <b>Figure S11</b> The (+)-HRMS(ESI) Spectroscopic Data of Compound <b>2</b> .                                                                                                                                                                           | 16   |
| 25  | <b>Figure S12</b> The $^1\text{H}$ NMR Spectrum of Compound <b>2</b> in $\text{DMSO}-d_6$ .                                                                                                                                                             | 16   |
| 26  | <b>Figure S13</b> The $^{13}\text{C}$ NMR Spectrum of Compound <b>2</b> in $\text{DMSO}-d_6$ .                                                                                                                                                          | 17   |
| 27  | <b>Figure S14</b> The DEPT Spectrum of Compound <b>2</b> in $\text{DMSO}-d_6$ .                                                                                                                                                                         | 17   |
| 28  | <b>Figure S15</b> The HSQC Spectrum of Compound <b>2</b> in $\text{DMSO}-d_6$ .                                                                                                                                                                         | 18   |
| 29  | <b>Figure S16</b> The $^1\text{H}$ - $^1\text{H}$ COSY Spectrum of Compound <b>2</b> in $\text{DMSO}-d_6$ .                                                                                                                                             | 18   |
| 30  | <b>Figure S17</b> The HMBC Spectrum of Compound <b>2</b> in $\text{DMSO}-d_6$ .                                                                                                                                                                         | 19   |
| 31  | <b>Figure S18</b> The NOESY Spectrum of Compound <b>2</b> in $\text{DMSO}-d_6$ .                                                                                                                                                                        | 19   |
| 32  | <b>Figure S19</b> The UV Spectrum of Compound <b>3</b> .                                                                                                                                                                                                | 20   |

|    |                                                                                                                  |    |
|----|------------------------------------------------------------------------------------------------------------------|----|
| 33 | <b>Figure S20</b> The (+)-HRMS(ESI) Spectroscopic Data of Compound <b>3</b> .                                    | 20 |
| 34 | <b>Figure S21</b> The $^1\text{H}$ NMR Spectrum of Compound <b>3</b> in $\text{CD}_3\text{OD}$ .                 | 21 |
| 35 | <b>Figure S22</b> The $^{13}\text{C}$ NMR Spectrum of Compound <b>3</b> in $\text{CD}_3\text{OD}$ .              | 21 |
| 36 | <b>Figure S23</b> The DEPT Spectrum of Compound <b>3</b> in $\text{CD}_3\text{OD}$ .                             | 22 |
| 37 | <b>Figure S24</b> The HSQC Spectrum of Compound <b>3</b> in $\text{CD}_3\text{OD}$ .                             | 22 |
| 38 | <b>Figure S25</b> The $^1\text{H}$ - $^1\text{H}$ COSY Spectrum of Compound <b>3</b> in $\text{CD}_3\text{OD}$ . | 23 |
| 39 | <b>Figure S26</b> The HMBC Spectrum of Compound <b>3</b> in $\text{CD}_3\text{OD}$ .                             | 23 |
| 40 | <b>Figure S27</b> The NOESY Spectrum of Compound <b>3</b> in $\text{CD}_3\text{OD}$ .                            | 24 |
| 41 | <b>Figure S28</b> The UV Spectrum of Compound <b>4</b> .                                                         | 24 |
| 42 | <b>Figure S29</b> The (+)-HRMS(ESI) Spectroscopic Data of Compound <b>4</b> .                                    | 25 |
| 43 | <b>Figure S30</b> The $^1\text{H}$ NMR Spectrum of Compound <b>4</b> in $\text{CD}_3\text{OD}$ .                 | 25 |
| 44 | <b>Figure S31</b> The $^{13}\text{C}$ NMR Spectrum of Compound <b>4</b> in $\text{CD}_3\text{OD}$ .              | 26 |
| 45 | <b>Figure S32</b> The DEPT Spectrum of Compound <b>4</b> in $\text{CD}_3\text{OD}$ .                             | 26 |
| 46 | <b>Figure S33</b> The HSQC Spectrum of Compound <b>4</b> in $\text{CD}_3\text{OD}$ .                             | 27 |
| 47 | <b>Figure S34</b> The $^1\text{H}$ - $^1\text{H}$ COSY Spectrum of Compound <b>4</b> in $\text{CD}_3\text{OD}$ . | 27 |
| 48 | <b>Figure S35</b> The HMBC Spectrum of Compound <b>4</b> in $\text{CD}_3\text{OD}$ .                             | 28 |
| 49 | <b>Figure S36</b> The NOESY Spectrum of Compound <b>4</b> in $\text{CD}_3\text{OD}$ .                            | 28 |

---

## compound 1 autored

**Table S1** Crystal data and structure refinement for compound **1** autored.

|                                             |                                                                |
|---------------------------------------------|----------------------------------------------------------------|
| Identification code                         | compound <b>1</b> autored                                      |
| Empirical formula                           | C <sub>24</sub> H <sub>36</sub> O <sub>6</sub>                 |
| Formula weight                              | 420.53                                                         |
| Temperature/K                               | 100.00(10)                                                     |
| Crystal system                              | monoclinic                                                     |
| Space group                                 | P2 <sub>1</sub>                                                |
| a/Å                                         | 9.33510(10)                                                    |
| b/Å                                         | 9.69210(10)                                                    |
| c/Å                                         | 13.5574(2)                                                     |
| $\alpha$ /°                                 | 90                                                             |
| $\beta$ /°                                  | 107.5540(10)                                                   |
| $\gamma$ /°                                 | 90                                                             |
| Volume/Å <sup>3</sup>                       | 1169.51(3)                                                     |
| Z                                           | 2                                                              |
| $\rho_{\text{calc}}$ /cm <sup>3</sup>       | 1.194                                                          |
| $\mu$ /mm <sup>-1</sup>                     | 0.685                                                          |
| F(000)                                      | 456.0                                                          |
| Crystal size/mm <sup>3</sup>                | 0.25 × 0.16 × 0.14                                             |
| Radiation                                   | Cu K $\alpha$ ( $\lambda$ = 1.54184)                           |
| 2 $\theta$ range for data collection/°      | 6.838 to 153.672                                               |
| Index ranges                                | -11 ≤ h ≤ 11, -11 ≤ k ≤ 12, -17 ≤ l ≤ 16                       |
| Reflections collected                       | 16082                                                          |
| Independent reflections                     | 4731 [ $R_{\text{int}}$ = 0.0227, $R_{\text{sigma}}$ = 0.0194] |
| Data/restraints/parameters                  | 4731/1/279                                                     |
| Goodness-of-fit on F <sup>2</sup>           | 1.042                                                          |
| Final R indexes [ $I \geq 2\sigma(I)$ ]     | $R_1$ = 0.0288, $wR_2$ = 0.0751                                |
| Final R indexes [all data]                  | $R_1$ = 0.0295, $wR_2$ = 0.0756                                |
| Largest diff. peak/hole / e Å <sup>-3</sup> | 0.28/-0.14                                                     |
| Flack parameter                             | 0.00(5)                                                        |

**Table S2** Fractional Atomic Coordinates ( $\times 10^4$ ) and Equivalent Isotropic Displacement Parameters ( $\text{\AA}^2 \times 10^3$ ) for compound **1** autored.  $U_{\text{eq}}$  is defined as 1/3 of of the trace of the orthogonalised  $U_{\text{H}}$  tensor.

| Atom | <i>x</i>   | <i>y</i>   | <i>z</i>   | <i>U</i> (eq) |
|------|------------|------------|------------|---------------|
| O001 | 2457.5(13) | 4042.4(13) | 1040.6(9)  | 22.6(3)       |
| O002 | 3094.1(14) | 2236.3(13) | 2975.8(10) | 25.8(3)       |
| O003 | 4507.5(15) | 3551.4(14) | 5157.2(10) | 29.7(3)       |
| O004 | 9359.3(17) | 8640.3(15) | 2526.8(12) | 37.7(4)       |
| O005 | 150.4(14)  | 4942.0(15) | 765.2(12)  | 36.2(3)       |
| O006 | 923.3(17)  | 1167.7(17) | 2792.0(14) | 44.8(4)       |
| C007 | 5741.7(18) | 4778.9(16) | 2701.4(12) | 18.1(3)       |
| C008 | 5243.5(19) | 5212.7(18) | 774.1(13)  | 21.4(4)       |
| C009 | 4270.0(18) | 4887.2(16) | 2597.7(12) | 18.1(3)       |
| C00A | 4796(2)    | 4257.0(18) | 4502.6(13) | 22.1(4)       |
| C00B | 952.1(19)  | 4041(2)    | 624.4(14)  | 23.5(4)       |
| C00C | 7580.9(19) | 6248.1(17) | 2127.4(13) | 20.0(3)       |
| C00D | 6455.8(18) | 5023.1(17) | 1835.8(12) | 18.4(3)       |
| C00E | 6829.4(19) | 4361.8(19) | 3730.0(13) | 22.3(4)       |
| C00F | 3890.3(19) | 6028.2(19) | 864.6(13)  | 22.3(3)       |
| C00G | 3156.9(19) | 5303.3(17) | 1575.9(13) | 20.6(3)       |
| C00H | 8145.1(19) | 8635.2(18) | 2952.9(14) | 23.8(4)       |
| C00I | 3600.4(19) | 4611.9(17) | 3484.7(14) | 20.6(3)       |
| C00J | 2416(2)    | 3478.3(19) | 3228.0(14) | 23.4(4)       |
| C00K | 2193(2)    | 1139(2)    | 2748.6(14) | 27.7(4)       |
| C00L | 6943.5(19) | 7654.2(18) | 2294.9(14) | 22.8(4)       |
| C00M | 6319.9(19) | 4852(2)    | 4640.0(13) | 24.6(4)       |
| C00N | 5852(2)    | 5817(2)    | -60.7(14)  | 28.8(4)       |
| C00O | 7378(2)    | 3725.7(18) | 1758.4(14) | 23.7(4)       |
| C00P | 2812(2)    | 5919(2)    | 3739.3(15) | 27.0(4)       |
| C00Q | 8627(2)    | 8119(2)    | 4057.9(15) | 27.7(4)       |
| C00R | 426(2)     | 2781(2)    | -6.7(17)   | 34.4(5)       |
| C00S | 2946(2)    | -88(2)     | 2456.0(15) | 33.9(4)       |
| C00T | 9981(3)    | 7764(2)    | 4606.2(17) | 39.6(5)       |
| C00U | 7496(2)    | 10083(2)   | 2949.1(18) | 36.5(5)       |

**Table S3** Anisotropic Displacement Parameters ( $\text{\AA}^2 \times 10^3$ ) for compound **1** autored. The Anisotropic displacement factor exponent takes the form:  $-2\pi^2[h^2a^{*2}U_{11}+2hka^*b^*U_{12}+\dots]$ .

| Atom | U <sub>11</sub> | U <sub>22</sub> | U <sub>33</sub> | U <sub>23</sub> | U <sub>13</sub> | U <sub>12</sub> |
|------|-----------------|-----------------|-----------------|-----------------|-----------------|-----------------|
| O001 | 17.7(6)         | 22.5(6)         | 26.5(6)         | -5.4(5)         | 5.0(5)          | -2.1(5)         |
| O002 | 25.7(6)         | 21.3(6)         | 32.6(7)         | -1.5(5)         | 12.2(5)         | -6.7(5)         |
| O003 | 31.1(7)         | 33.7(8)         | 27.2(7)         | 7.4(6)          | 13.3(5)         | -1.6(6)         |
| O004 | 43.2(8)         | 33.4(8)         | 46.4(8)         | -13.8(7)        | 28.5(7)         | -21.3(7)        |
| O005 | 21.0(6)         | 29.7(8)         | 54.9(9)         | -0.8(7)         | 7.1(6)          | 1.5(6)          |
| O006 | 34.5(8)         | 33.8(8)         | 69.5(12)        | -6.8(8)         | 20.7(8)         | -17.7(7)        |
| C007 | 21.8(8)         | 13.0(7)         | 19.6(7)         | -0.1(6)         | 6.5(6)          | -3.6(6)         |
| C008 | 22.9(8)         | 21.5(8)         | 19.7(8)         | -1.9(6)         | 6.2(7)          | -3.7(7)         |
| C009 | 21.6(7)         | 13.0(7)         | 20.0(8)         | -0.7(6)         | 7.1(6)          | -3.1(6)         |
| C00A | 25.9(9)         | 20.6(8)         | 22.6(8)         | -1.2(7)         | 11.7(7)         | 0.5(7)          |
| C00B | 18.2(8)         | 27.0(9)         | 25.4(8)         | 2.6(7)          | 6.9(6)          | -2.6(7)         |
| C00C | 20.8(8)         | 19.0(8)         | 21.3(8)         | -0.9(6)         | 8.0(6)          | -4.3(6)         |
| C00D | 19.8(7)         | 16.8(8)         | 19.4(7)         | 0.0(6)          | 7.2(6)          | -2.4(6)         |
| C00E | 20.4(8)         | 25.7(9)         | 21.7(8)         | 2.9(7)          | 7.6(7)          | -1.0(7)         |
| C00F | 24.0(8)         | 21.4(8)         | 20.1(8)         | 2.3(6)          | 4.3(7)          | -0.2(7)         |
| C00G | 20.5(8)         | 17.0(8)         | 23.9(8)         | -1.9(6)         | 6.1(7)          | -0.9(6)         |
| C00H | 24.0(8)         | 20.4(9)         | 27.4(9)         | -3.4(7)         | 8.4(7)          | -4.3(7)         |
| C00I | 20.0(8)         | 19.5(8)         | 23.6(8)         | -1.0(6)         | 8.6(7)          | -2.2(6)         |
| C00J | 22.3(8)         | 23.8(9)         | 27.0(8)         | 1.2(7)          | 11.8(7)         | -3.1(7)         |
| C00K | 33.8(10)        | 25.3(9)         | 23.7(9)         | 3.0(7)          | 8.4(7)          | -11.0(8)        |
| C00L | 23.3(8)         | 17.1(8)         | 26.4(8)         | 0.6(7)          | 5.1(7)          | -1.9(7)         |
| C00M | 25.6(8)         | 27.5(9)         | 20.0(8)         | -0.1(7)         | 6.0(7)          | -3.2(8)         |
| C00N | 28.8(9)         | 38.2(11)        | 19.4(8)         | 2.0(8)          | 7.4(7)          | -2.9(8)         |
| C00O | 25.5(8)         | 20.0(8)         | 27.0(9)         | -2.4(7)         | 10.1(7)         | -1.5(7)         |
| C00P | 28.8(9)         | 26.5(9)         | 28.0(9)         | -1.0(7)         | 12.3(7)         | 3.2(8)          |
| C00Q | 28.6(9)         | 27.2(10)        | 28.0(9)         | -5.4(7)         | 9.7(8)          | -1.1(7)         |
| C00R | 23.2(9)         | 41.0(12)        | 37.7(11)        | -12.0(9)        | 7.1(8)          | -8.7(8)         |
| C00S | 47.3(11)        | 26.2(10)        | 30.6(10)        | -1.6(8)         | 15.3(9)         | -8.3(9)         |
| C00T | 40.7(11)        | 36.9(11)        | 34.9(11)        | -6.3(9)         | 1.7(9)          | 4.9(9)          |
| C00U | 36.4(10)        | 19.6(9)         | 45.5(12)        | -3.8(9)         | 0.4(9)          | -2.0(8)         |

**Table S4** Bond Lengths for compound **1** autored.

| Atom | Atom | Length/Å | Atom | Atom | Length/Å |
|------|------|----------|------|------|----------|
| O001 | C00B | 1.347(2) | C00A | C00I | 1.530(2) |
| O001 | C00G | 1.470(2) | C00A | C00M | 1.493(2) |
| O002 | C00J | 1.448(2) | C00B | C00R | 1.488(3) |
| O002 | C00K | 1.333(2) | C00C | C00D | 1.555(2) |
| O003 | C00A | 1.213(2) | C00C | C00L | 1.531(2) |
| O004 | C00H | 1.419(2) | C00D | C00O | 1.545(2) |
| O005 | C00B | 1.202(2) | C00E | C00M | 1.526(2) |
| O006 | C00K | 1.204(2) | C00F | C00G | 1.514(2) |
| C007 | C009 | 1.342(2) | C00H | C00L | 1.534(2) |
| C007 | C00D | 1.533(2) | C00H | C00Q | 1.514(3) |
| C007 | C00E | 1.512(2) | C00H | C00U | 1.528(3) |
| C008 | C00D | 1.550(2) | C00I | C00J | 1.523(2) |
| C008 | C00F | 1.526(2) | C00I | C00P | 1.555(2) |
| C008 | C00N | 1.528(2) | C00K | C00S | 1.495(3) |
| C009 | C00G | 1.514(2) | C00Q | C00T | 1.304(3) |
| C009 | C00I | 1.537(2) |      |      |          |

**Table S5** Bond Angles for compound **1** autored.

| Atom | Atom | Atom | Angle/°    | Atom | Atom | Atom | Angle/°    |
|------|------|------|------------|------|------|------|------------|
| C00B | O001 | C00G | 117.34(13) | C007 | C00E | C00M | 112.10(14) |
| C00K | O002 | C00J | 115.27(14) | C00G | C00F | C008 | 110.81(14) |
| C009 | C007 | C00D | 125.14(15) | O001 | C00G | C009 | 108.08(13) |
| C009 | C007 | C00E | 119.93(14) | O001 | C00G | C00F | 106.87(14) |
| C00E | C007 | C00D | 114.92(14) | C00F | C00G | C009 | 112.89(14) |
| C00F | C008 | C00D | 112.14(13) | O004 | C00H | C00L | 107.40(14) |
| C00F | C008 | C00N | 111.26(15) | O004 | C00H | C00Q | 111.62(15) |
| C00N | C008 | C00D | 113.76(14) | O004 | C00H | C00U | 111.10(16) |
| C007 | C009 | C00G | 120.99(14) | C00Q | C00H | C00L | 108.52(15) |
| C007 | C009 | C00I | 123.34(14) | C00Q | C00H | C00U | 107.85(16) |
| C00G | C009 | C00I | 115.67(13) | C00U | C00H | C00L | 110.34(15) |
| O003 | C00A | C00I | 121.59(16) | C009 | C00I | C00P | 111.33(14) |
| O003 | C00A | C00M | 122.68(17) | C00A | C00I | C009 | 112.74(13) |
| C00M | C00A | C00I | 115.73(14) | C00A | C00I | C00P | 104.38(14) |
| O001 | C00B | C00R | 111.31(15) | C00J | C00I | C009 | 112.66(14) |
| O005 | C00B | O001 | 123.63(17) | C00J | C00I | C00A | 109.03(14) |
| O005 | C00B | C00R | 125.05(16) | C00J | C00I | C00P | 106.18(14) |
| C00L | C00C | C00D | 117.02(14) | O002 | C00J | C00I | 108.33(13) |
| C007 | C00D | C008 | 111.40(13) | O002 | C00K | C00S | 112.42(16) |
| C007 | C00D | C00C | 109.85(13) | O006 | C00K | O002 | 122.18(19) |
| C007 | C00D | C00O | 107.83(13) | O006 | C00K | C00S | 125.40(18) |
| C008 | C00D | C00C | 113.17(13) | C00C | C00L | C00H | 112.90(14) |
| C00O | C00D | C008 | 107.40(13) | C00A | C00M | C00E | 107.22(14) |
| C00O | C00D | C00C | 106.93(13) | C00T | C00Q | C00H | 126.8(2)   |



**Table S6** Hydrogen Bonds for compound **1** autored.

| <b>D</b> | <b>H</b> | <b>A</b>          | <b>d(D-H)/Å</b> | <b>d(H-A)/Å</b> | <b>d(D-A)/Å</b> | <b>D-H-A/°</b> |
|----------|----------|-------------------|-----------------|-----------------|-----------------|----------------|
| O004     | H004     | O006 <sup>1</sup> | 0.84            | 1.98            | 2.819(2)        | 173.9          |

<sup>1</sup>1+X,1+Y,+Z**Table S7** Torsion Angles for compound **1** autored.

| <b>A</b> | <b>B</b> | <b>C</b> | <b>D</b> | <b>Angle/°</b> | <b>A</b> | <b>B</b> | <b>C</b> | <b>D</b> | <b>Angle/°</b> |
|----------|----------|----------|----------|----------------|----------|----------|----------|----------|----------------|
| O003     | C00A     | C00I     | C009     | -153.05(16)    | C00E     | C007     | C00D     | C00O     | 53.22(18)      |
| O003     | C00A     | C00I     | C00J     | -27.1(2)       | C00F     | C008     | C00D     | C007     | 37.87(19)      |
| O003     | C00A     | C00I     | C00P     | 86.0(2)        | C00F     | C008     | C00D     | C00C     | -86.48(17)     |
| O003     | C00A     | C00M     | C00E     | 123.88(18)     | C00F     | C008     | C00D     | C00O     | 155.74(14)     |
| O004     | C00H     | C00L     | C00C     | 49.8(2)        | C00G     | O001     | C00B     | O005     | -8.6(2)        |
| O004     | C00H     | C00Q     | C00T     | 2.8(3)         | C00G     | O001     | C00B     | C00R     | 172.49(15)     |
| C007     | C009     | C00G     | O001     | 98.11(17)      | C00G     | C009     | C00I     | C00A     | -177.57(14)    |
| C007     | C009     | C00G     | C00F     | -19.9(2)       | C00G     | C009     | C00I     | C00J     | 58.50(19)      |
| C007     | C009     | C00I     | C00A     | 2.2(2)         | C00G     | C009     | C00I     | C00P     | -60.65(18)     |
| C007     | C009     | C00I     | C00J     | -121.74(17)    | C00I     | C009     | C00G     | O001     | -82.13(17)     |
| C007     | C009     | C00I     | C00P     | 119.10(17)     | C00I     | C009     | C00G     | C00F     | 159.88(14)     |
| C007     | C00E     | C00M     | C00A     | 57.73(19)      | C00I     | C00A     | C00M     | C00E     | -57.1(2)       |
| C008     | C00F     | C00G     | O001     | -69.16(17)     | C00J     | O002     | C00K     | O006     | -2.9(3)        |
| C008     | C00F     | C00G     | C009     | 49.54(19)      | C00J     | O002     | C00K     | C00S     | 177.75(15)     |
| C009     | C007     | C00D     | C008     | -8.1(2)        | C00K     | O002     | C00J     | C00I     | 178.96(14)     |
| C009     | C007     | C00D     | C00C     | 118.15(17)     | C00L     | C00C     | C00D     | C007     | -60.81(19)     |
| C009     | C007     | C00D     | C00O     | -125.66(17)    | C00L     | C00C     | C00D     | C008     | 64.39(19)      |
| C009     | C007     | C00E     | C00M     | -31.3(2)       | C00L     | C00C     | C00D     | C00O     | -177.57(14)    |
| C009     | C00I     | C00J     | O002     | 57.43(19)      | C00L     | C00H     | C00Q     | C00T     | 120.9(2)       |
| C00A     | C00I     | C00J     | O002     | -68.52(17)     | C00M     | C00A     | C00I     | C009     | 27.9(2)        |
| C00B     | O001     | C00G     | C009     | 133.55(14)     | C00M     | C00A     | C00I     | C00J     | 153.83(15)     |
| C00B     | O001     | C00G     | C00F     | -104.67(16)    | C00M     | C00A     | C00I     | C00P     | -93.05(17)     |
| C00D     | C007     | C009     | C00G     | -1.2(2)        | C00N     | C008     | C00D     | C007     | 165.23(15)     |
| C00D     | C007     | C009     | C00I     | 179.08(15)     | C00N     | C008     | C00D     | C00C     | 40.9(2)        |
| C00D     | C007     | C00E     | C00M     | 149.77(15)     | C00N     | C008     | C00D     | C00O     | -76.90(18)     |
| C00D     | C008     | C00F     | C00G     | -59.71(19)     | C00N     | C008     | C00F     | C00G     | 171.60(14)     |
| C00D     | C00C     | C00L     | C00H     | 158.46(14)     | C00P     | C00I     | C00J     | O002     | 179.53(13)     |
| C00E     | C007     | C009     | C00G     | 180.00(15)     | C00Q     | C00H     | C00L     | C00C     | -71.02(19)     |
| C00E     | C007     | C009     | C00I     | 0.3(2)         | C00U     | C00H     | C00L     | C00C     | 171.02(16)     |
| C00E     | C007     | C00D     | C008     | 170.82(14)     | C00U     | C00H     | C00Q     | C00T     | -119.5(2)      |
| C00E     | C007     | C00D     | C00C     | -62.97(18)     |          |          |          |          |                |

**Table S8** Hydrogen Atom Coordinates ( $\text{\AA}\times 10^4$ ) and Isotropic Displacement Parameters ( $\text{\AA}^2\times 10^3$ ) for compound **1** autored.

| Atom | <i>x</i> | <i>y</i> | <i>z</i> | U(eq) |
|------|----------|----------|----------|-------|
| H004 | 9766.83  | 9422.05  | 2610.15  | 57    |
| H008 | 4865.79  | 4268.03  | 532.75   | 26    |
| H00A | 8379.92  | 5999.6   | 2769.27  | 24    |
| H00B | 8062.73  | 6349.87  | 1573.37  | 24    |
| H00C | 7830.86  | 4755.98  | 3791.23  | 27    |
| H00D | 6926.84  | 3344.3   | 3756.48  | 27    |
| H00E | 4217.87  | 6961.15  | 1137.94  | 27    |
| H00F | 3150.99  | 6133.11  | 170.66   | 27    |
| H00G | 2367.3   | 5912.44  | 1704.69  | 25    |
| H00H | 2044.02  | 3308.51  | 3828.32  | 28    |
| H00I | 1554.33  | 3760.08  | 2633.32  | 28    |
| H00J | 6157.56  | 7515.83  | 2638.91  | 27    |
| H00K | 6463.31  | 8087.02  | 1613.7   | 27    |
| H00L | 7031.8   | 4533.74  | 5300.61  | 29    |
| H00M | 6276.84  | 5872.62  | 4650.21  | 29    |
| H00N | 6106.78  | 6790.67  | 92.2     | 43    |
| H00O | 5085.58  | 5739.97  | -736.07  | 43    |
| H00P | 6752.95  | 5308.13  | -73.8    | 43    |
| H00Q | 8187.13  | 3601.04  | 2408.48  | 35    |
| H00R | 7810.94  | 3838.62  | 1188.63  | 35    |
| H00S | 6720.55  | 2914.61  | 1628.97  | 35    |
| H00T | 3517.29  | 6695.34  | 3879.35  | 40    |
| H00U | 2485.1   | 5741.33  | 4349.86  | 40    |
| H00V | 1937.19  | 6143.41  | 3149.17  | 40    |
| H00W | 7864.3   | 8045.42  | 4386.59  | 33    |
| H00X | 561.94   | 2898.96  | -690.67  | 52    |
| H00Y | -640.85  | 2629.47  | -84.46   | 52    |
| H    | 1008.93  | 1982.79  | 339.32   | 52    |
| H00Z | 3381.58  | 169.93   | 1908.89  | 51    |
| HA   | 2206.13  | -824.85  | 2205.26  | 51    |
| HB   | 3743.15  | -414.49  | 3062.16  | 51    |
| H00  | 10785.65 | 7817.43  | 4314.47  | 48    |
| HC   | 10162.43 | 7451.25  | 5297.3   | 48    |
| H1   | 8276.5   | 10699.6  | 3367.81  | 55    |
| HD   | 6654.43  | 10049.69 | 3239.6   | 55    |
| HE   | 7141.48  | 10428.91 | 2237.28  | 55    |

## Computational Section

Spartan 14 program (Wavefunction Inc., Irvine, CA, USA) was used for calculating Merck molecular force field (MMFF). Gaussian 16 program package<sup>1</sup> was used for density functional theory (DFT) and time-dependent density functional theory (TDDFT) calculations. The conformational search was performed by a MMFF model, then the conformers with lower relative energies ( $< 10$  kcal/mol) were subjected to geometry optimization with the DFT method at the B3LYP/6-31G\* level. Vibrational frequency calculations were done at the same level to evaluate their relative thermal ( $\Delta E$ ) and free energies ( $\Delta G$ ) at 298.15 K. To obtain the energies of these lower energy conformers, the geometry optimized conformers were further calculated at the B3LYP/6-311G\* level was taken into consideration using SMD. The specific optical rotation calculations for compounds were performed using the foregoing lower energy conformers at the B3LYP/6-311G\* level, all of which were subjected to specific optical rotation calculations at the B3LYP/6-311+G(d) level in MeOH with SMD model. The calculated specific optical rotation data of these conformers were averaged according to the Boltzmann distribution theory and their relative Gibbs free energy.

**Table S9.** Energies of the dominative conformers of compound **1**.

| Compound | No. | Structure                                                                           | $E$ (Hartree)  | Population (%) |
|----------|-----|-------------------------------------------------------------------------------------|----------------|----------------|
| <b>1</b> | C1  | 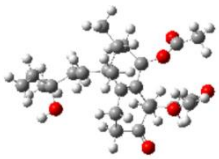 | -1387.74167452 | 80.97          |
|          | C2  |  | -1387.73608350 | 0.15           |
|          | C3  |  | -1387.73314361 | 0.01           |

|  |    |                                                                                   |                |       |
|--|----|-----------------------------------------------------------------------------------|----------------|-------|
|  | C4 | 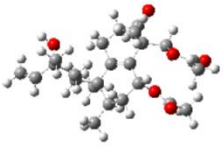 | -1387.74141520 | 6.97  |
|  | C5 |  | -1387.73991870 | 11.91 |

**Table S10.** Energies of the dominative conformers of compounds **2** and **3**.

| compounds | No. | structure                                                                           | $E_{6-311g(d)}$ | $G$           |
|-----------|-----|-------------------------------------------------------------------------------------|-----------------|---------------|
| <b>2</b>  | C1  | 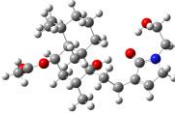   | -1369.2434281   | -1368.7022451 |
|           | C2  |  | -1369.2434281   | -1368.7022451 |
|           | C3  |  | -1369.2432885   | -1368.7021805 |
|           | C4  |  | -1369.2432885   | -1368.7021665 |
|           | C5  |  | -1369.2417468   | -1368.7018458 |

|          |    |                                                                                    |               |               |
|----------|----|------------------------------------------------------------------------------------|---------------|---------------|
|          | C6 | 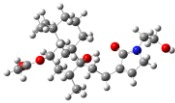  | -1369.2418376 | -1368.7017786 |
| <b>3</b> | C1 |   | -1348.6309858 | -1348.1570218 |
|          | C2 |   | -1348.6309851 | -1348.1570031 |
|          | C3 |   | -1348.6307963 | -1348.1564193 |
|          | C4 |  | -1348.6313701 | -1348.1573801 |

**Table S11.** Calculated and measured OR values of compounds **2**, **3** and **4** at different wavelengths.

| compounds | Rotation value      | $[\alpha]_{633}$ | $[\alpha]_{589}$ | $[\alpha]_{546}$ | $[\alpha]_{436}$ | $[\alpha]_{365}$ |
|-----------|---------------------|------------------|------------------|------------------|------------------|------------------|
| <b>2</b>  | $[\alpha]_D$ calcd. | -81.50           | -96.42           | -115.63          | -206.95          | -355.04          |
|           | $[\alpha]_D$ exptl. | 34.48            | 51.77            | 64.37            | 187.27           | 234.83           |
| <b>3</b>  | $[\alpha]_D$ calcd. | -34.65           | -41.33           | -49.97           | -89.34           | -92.72           |
|           | $[\alpha]_D$ exptl. | 19.04            | 24.84            | 27.78            | 49.82            | 69.03            |
| <b>4</b>  | $[\alpha]_D$ exptl. | 7.08             | 20.53            | 24.52            | 29.60            | 37.20            |

**Table S12** The docking pockets

| Receptor | Pocket Position    | Pocket size |
|----------|--------------------|-------------|
| INOS     | center_x = 122.834 | size_x = 30 |
|          | center_y = 114.553 | size_y = 30 |
|          | center_z = 36.778  | size_z = 30 |
| COX-2    | center_x = 26.999  | size_x = 30 |
|          | center_y = 23.927  | size_y = 30 |
|          | center_z = 15.269  | size_z = 30 |

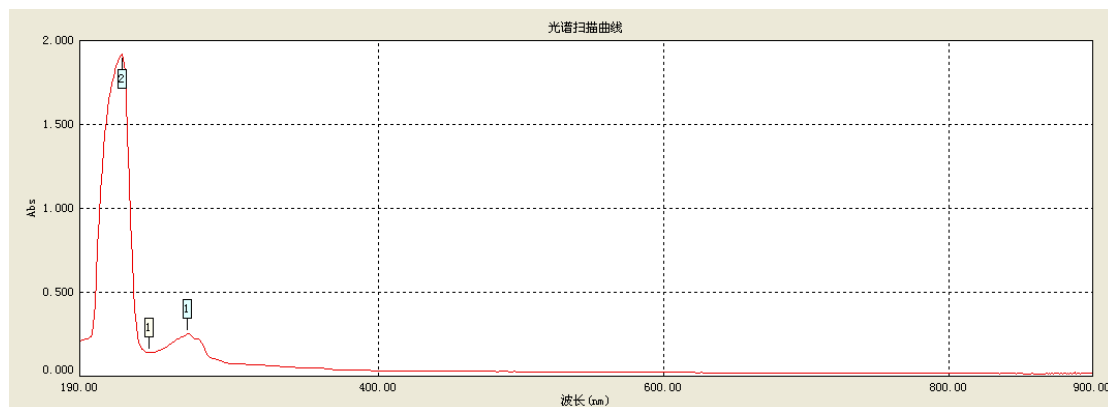**Figure S1** The UV Spectrum of Compound 1.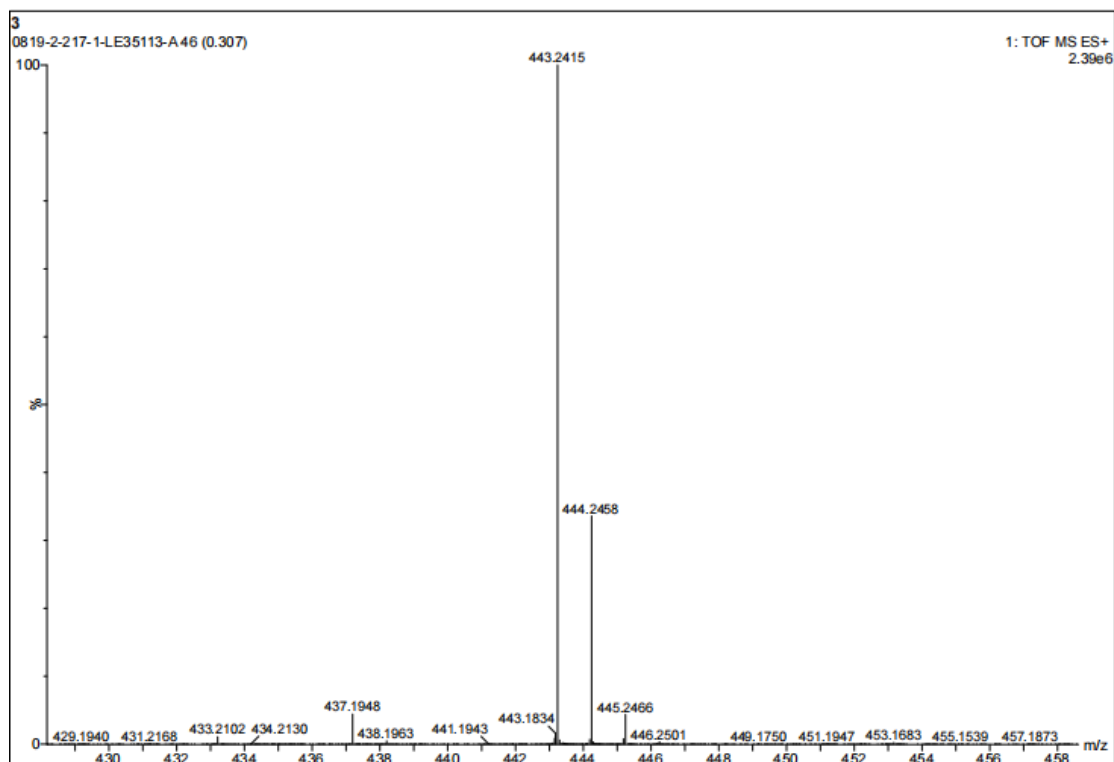**Figure S2** The (+)-HRMS(ESI) Spectroscopic Data of Compound 1.

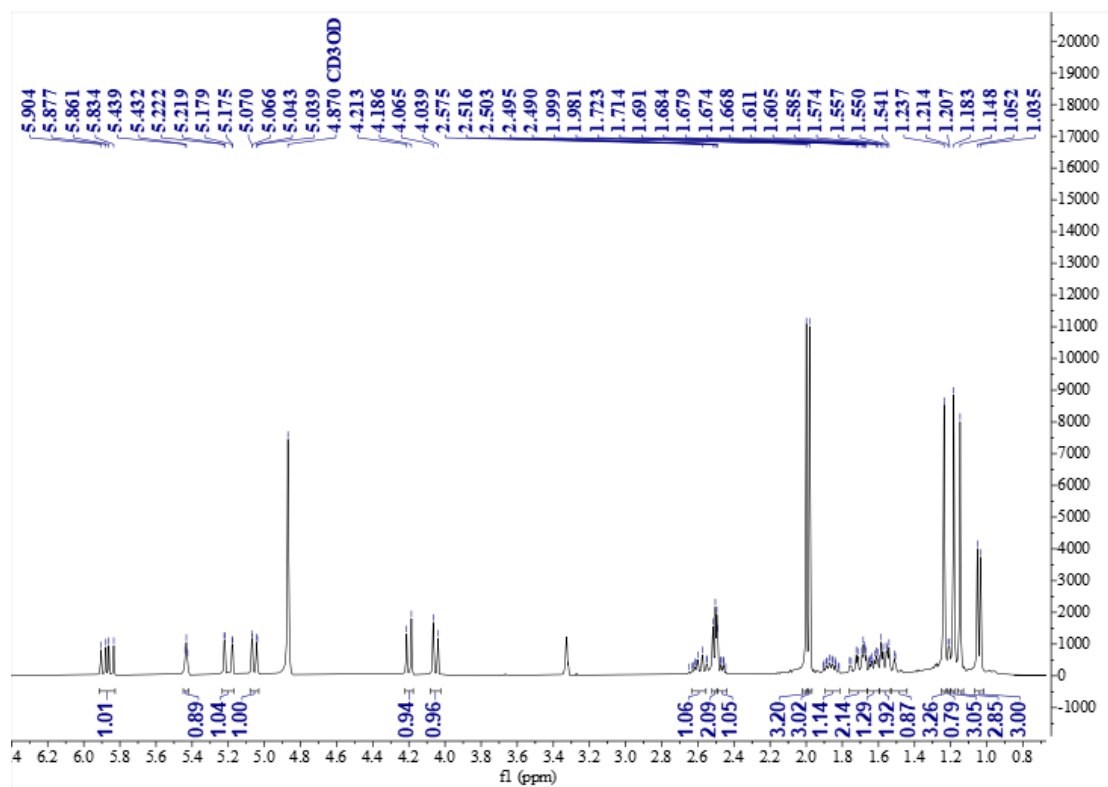

Figure S3 The <sup>1</sup>H NMR Spectrum of Compound 1 in CD<sub>3</sub>OD.

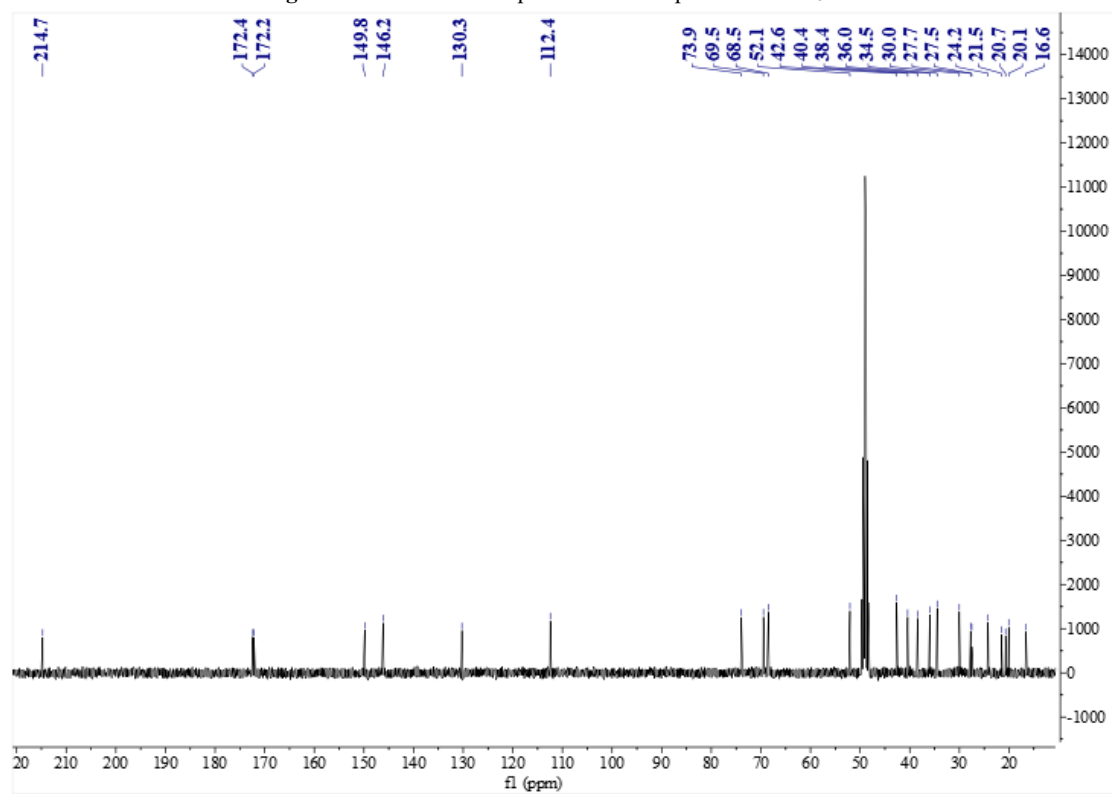

Figure S4 The <sup>13</sup>C NMR Spectrum of Compound 1 in CD<sub>3</sub>OD.

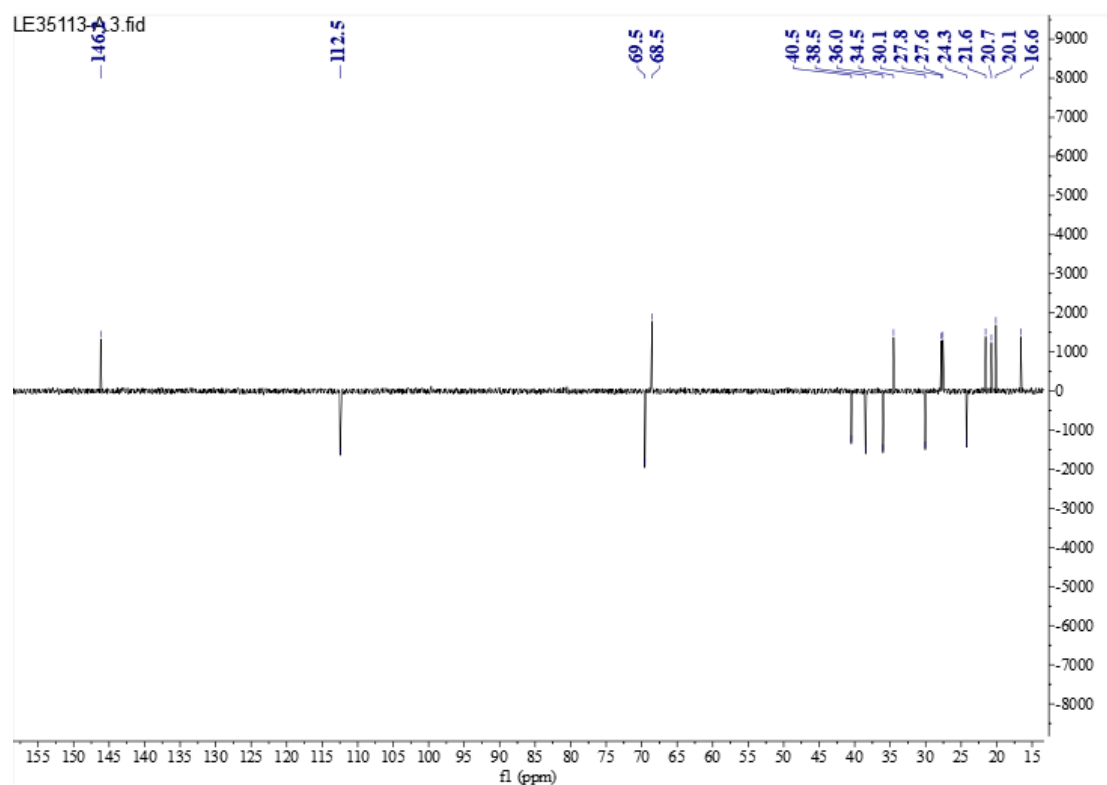

**Figure S5** The DEPT Spectrum of Compound **1** in CD<sub>3</sub>OD.

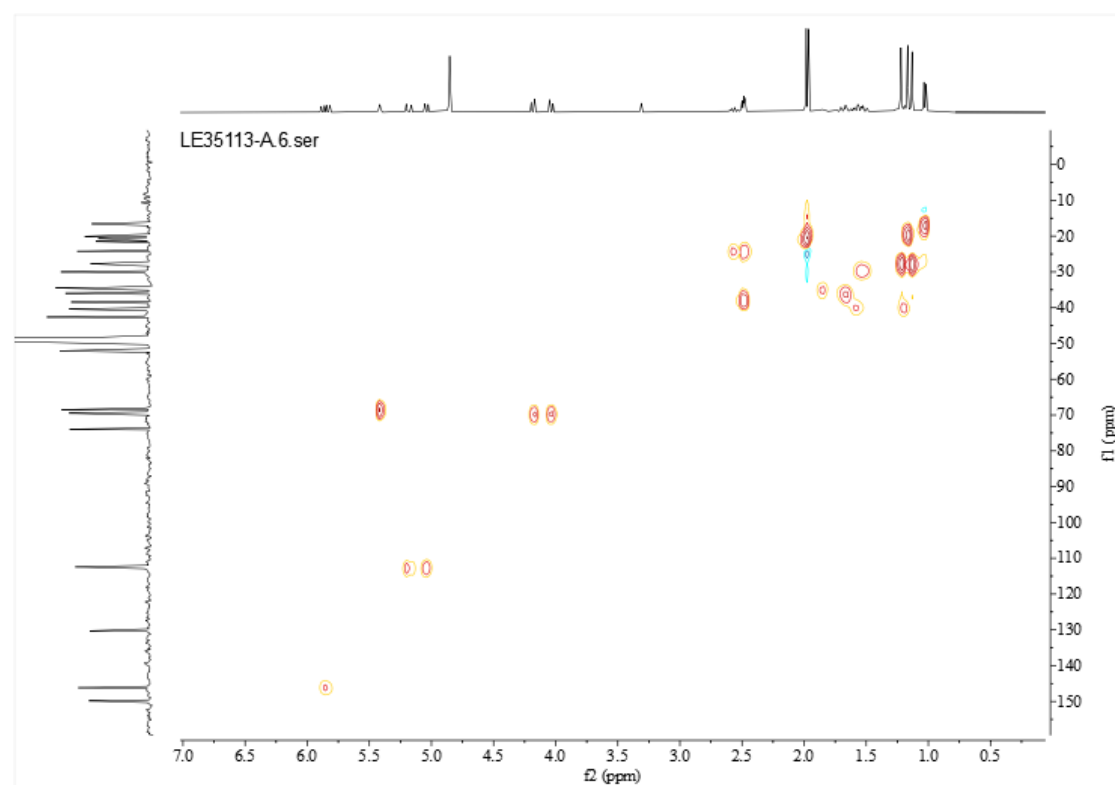

**Figure S6** The HSQC Spectrum of Compound **1** in CD<sub>3</sub>OD.



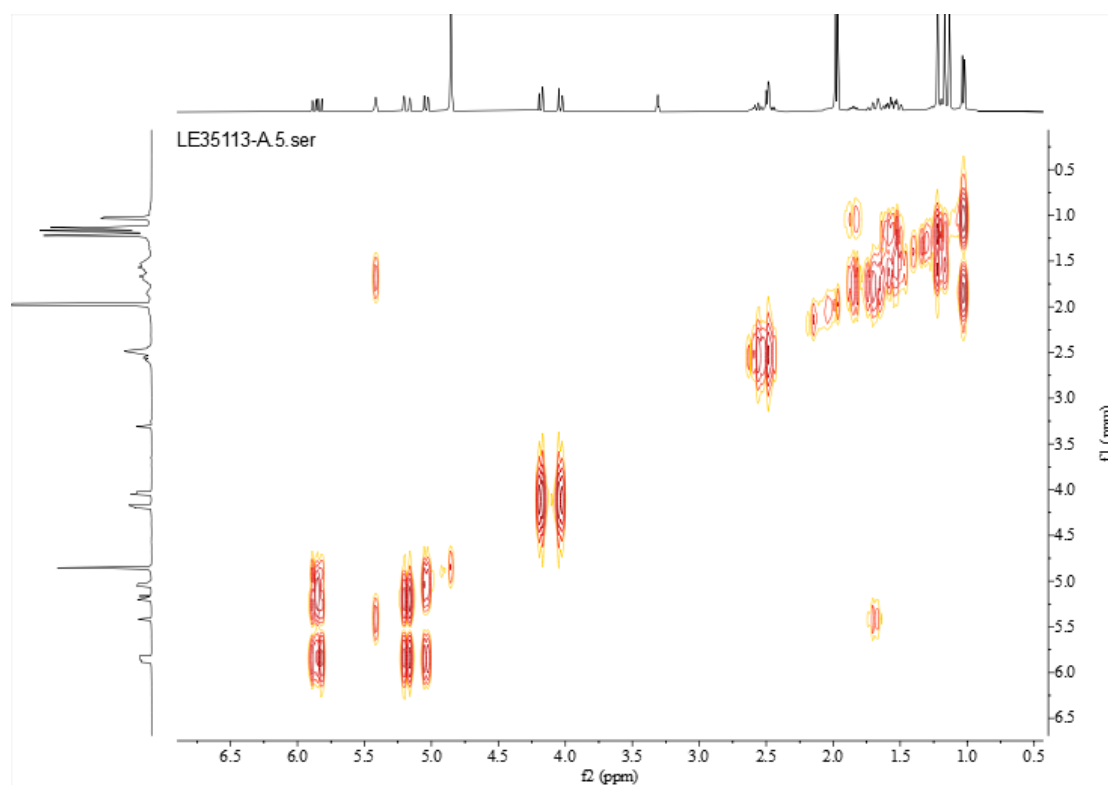

**Figure S7** The  $^1\text{H}$ - $^1\text{H}$  COSY Spectrum of Compound **1** in  $\text{CD}_3\text{OD}$ .

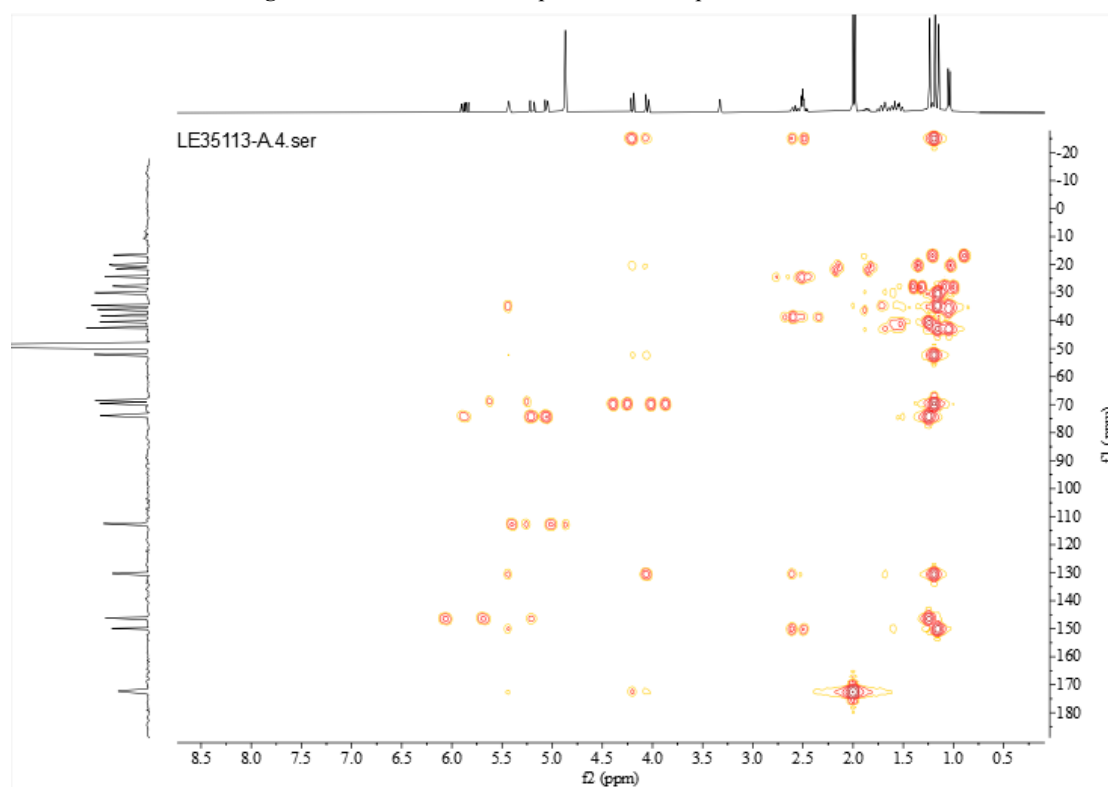

**Figure S8** The HMBC Spectrum of Compound **1** in  $\text{CD}_3\text{OD}$ .

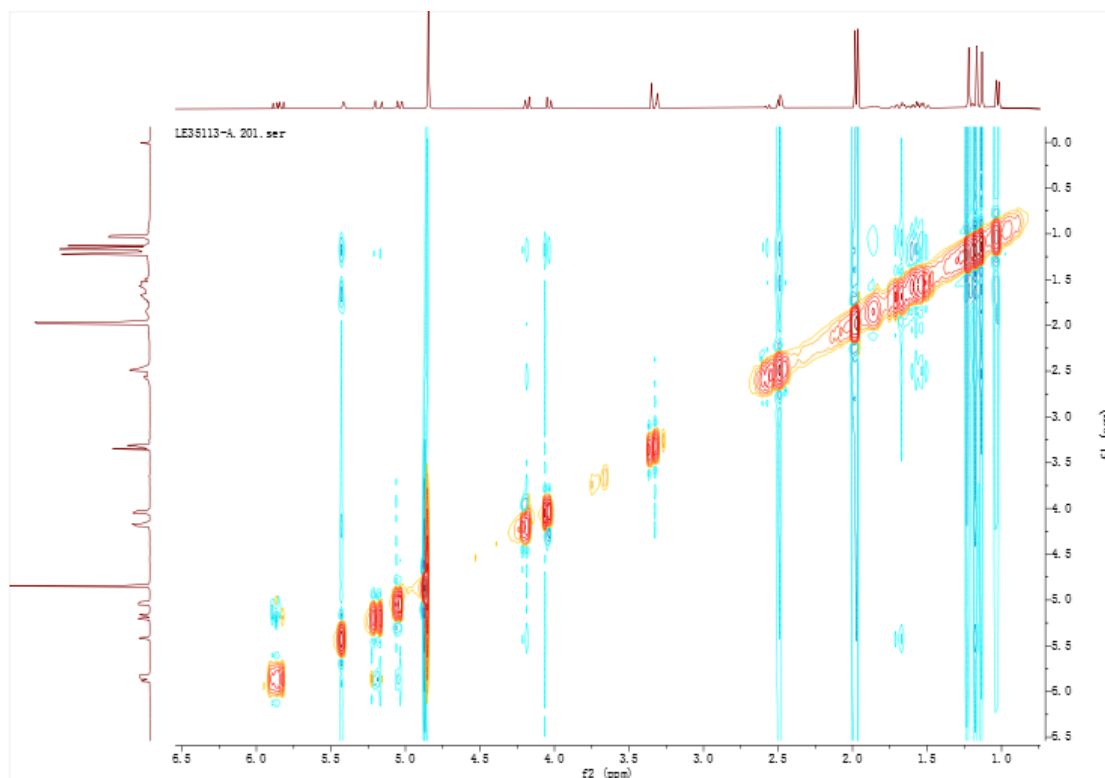

**Figure S9** The NOESY Spectrum of Compound **1** in CD<sub>3</sub>OD.

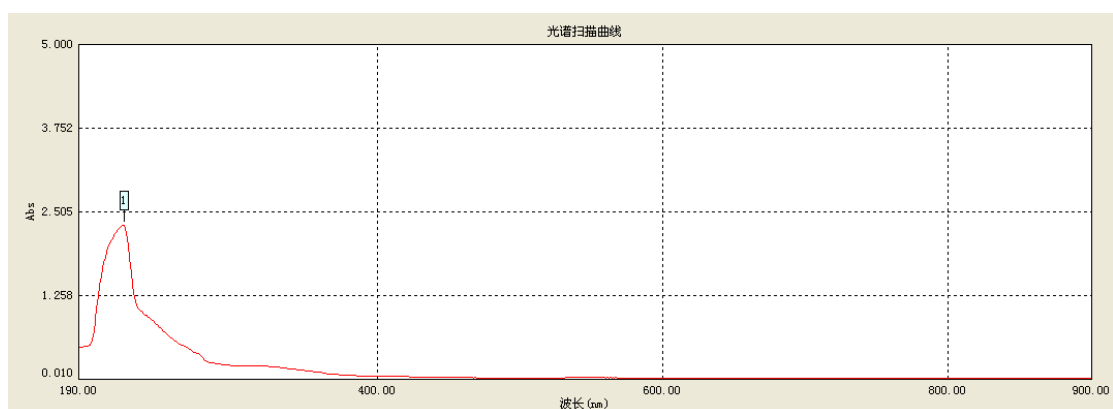

**Figure S10** The UV Spectrum of Compound **2**.

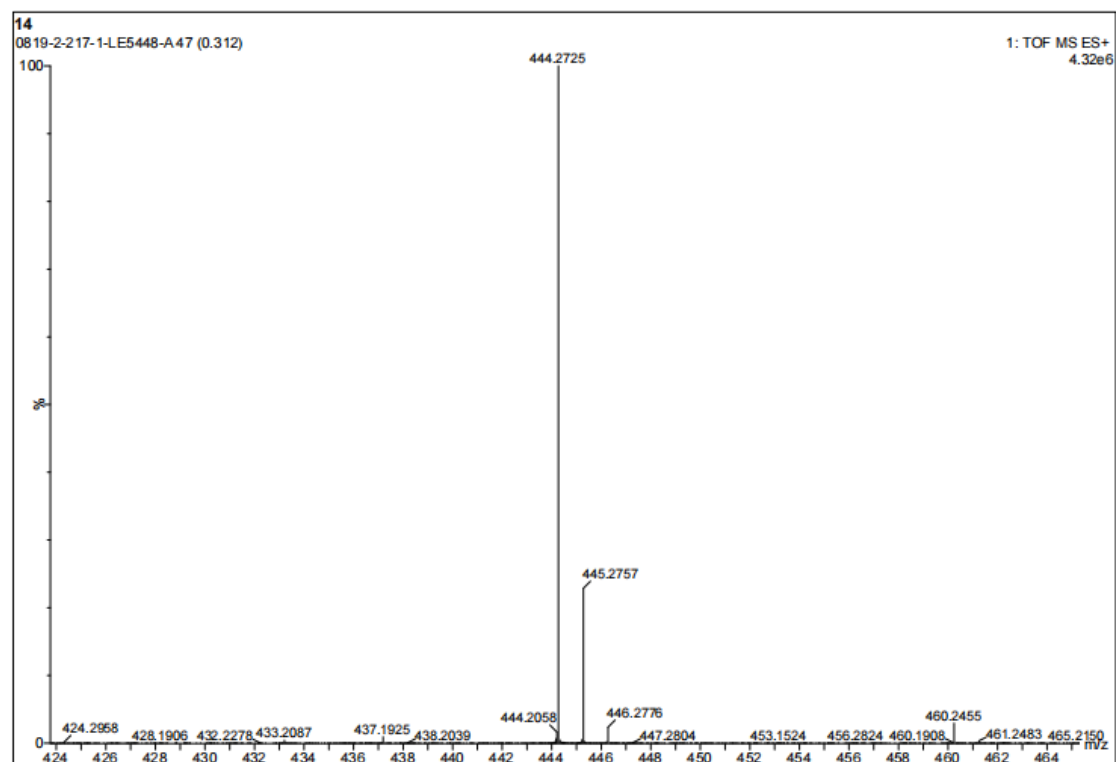

**Figure S11** The (+)-HRMS(ESI) Spectroscopic Data of Compound **2**.

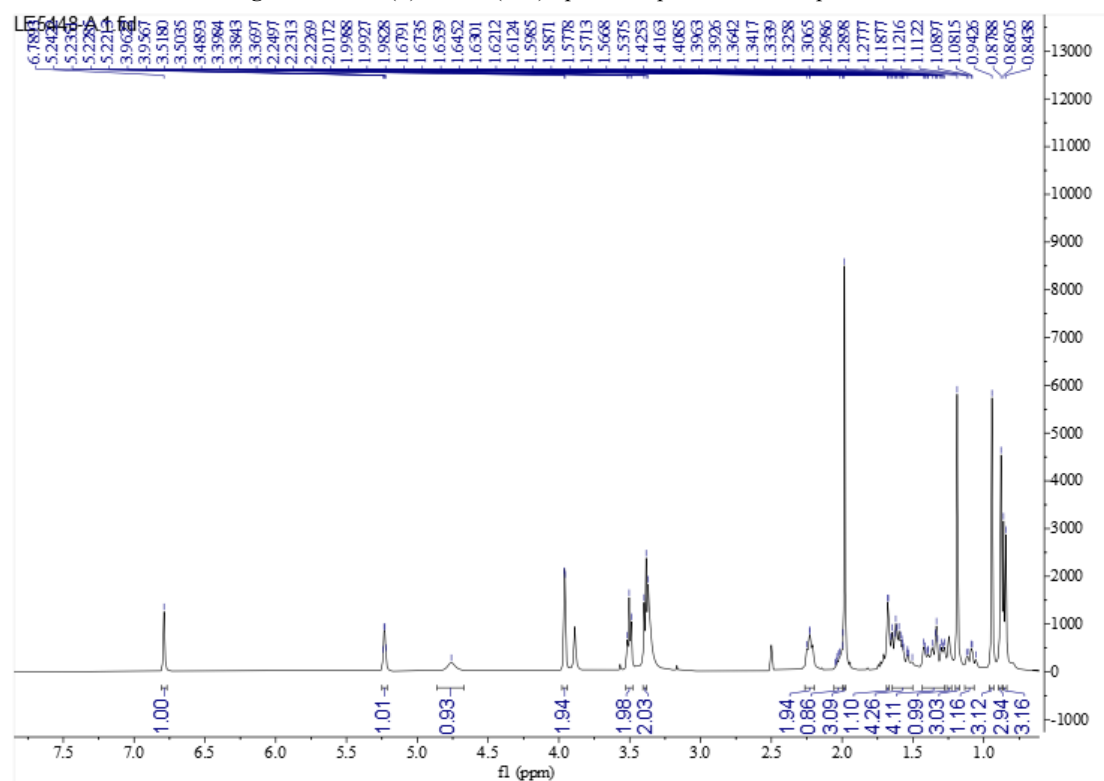

**Figure S12** The  $^1\text{H}$  NMR Spectrum of Compound **2** in  $\text{DMSO}-d_6$ .

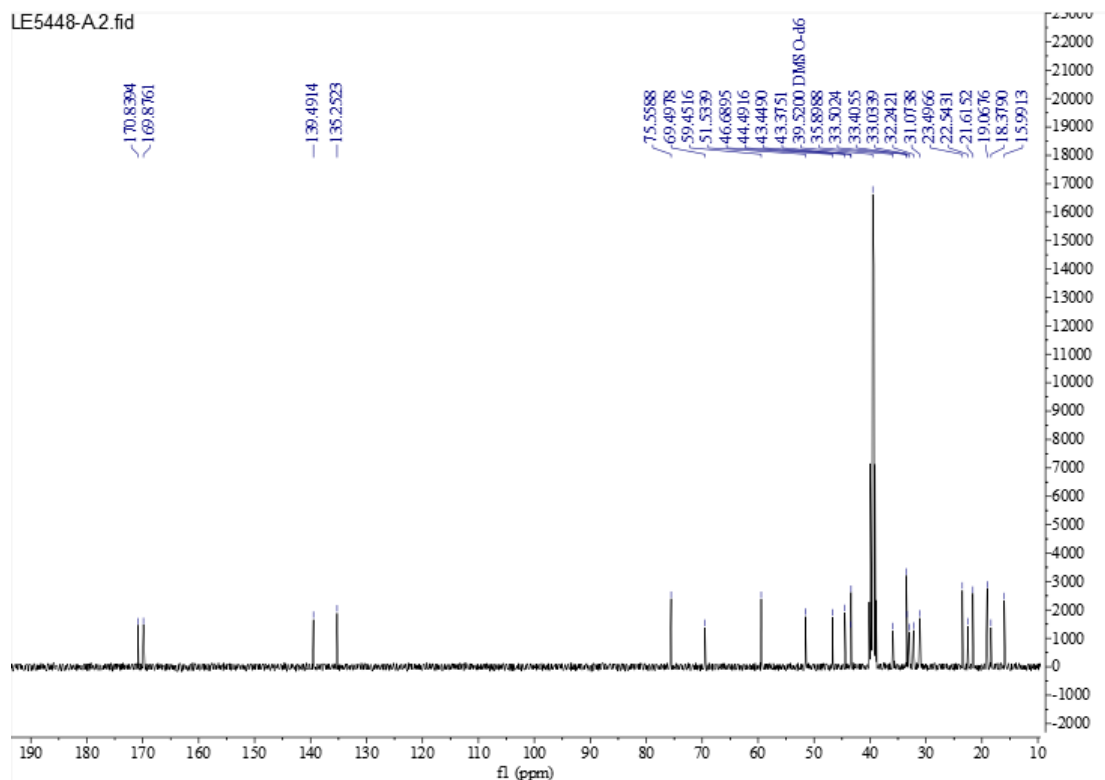

Figure S13 The  $^{13}\text{C}$  NMR Spectrum of Compound **2** in  $\text{DMSO-}d_6$ .

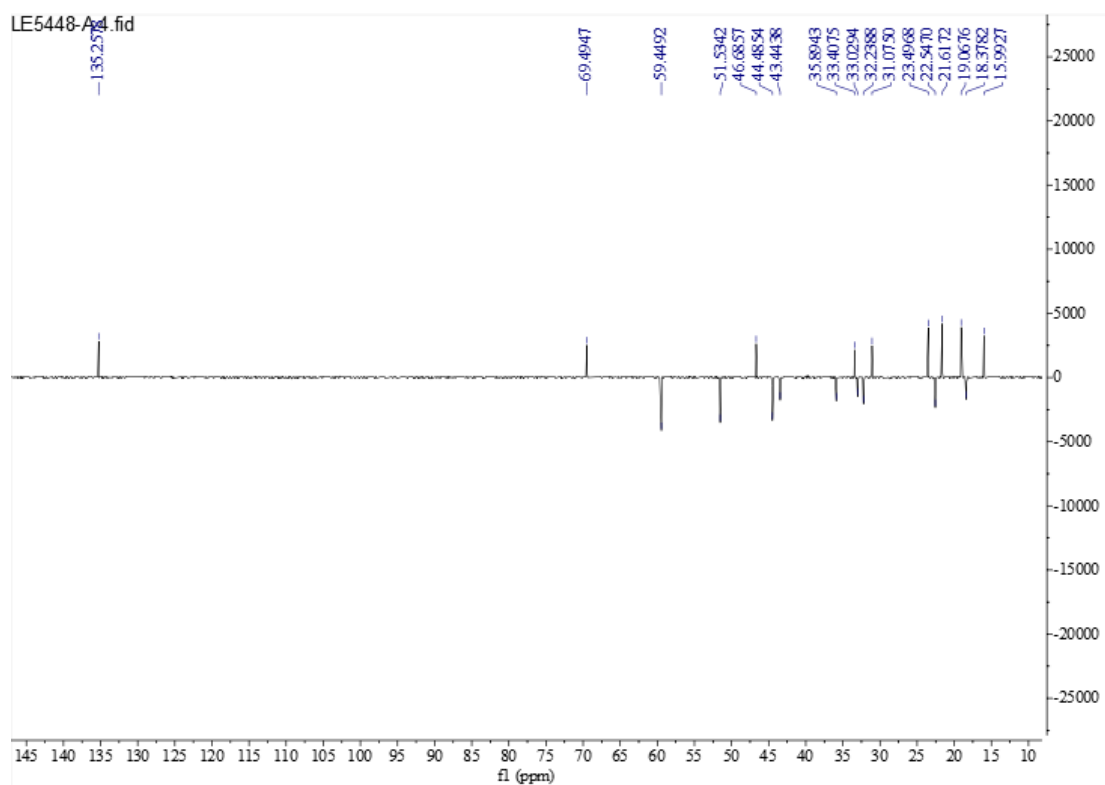

Figure S14 The DEPT Spectrum of Compound **2** in  $\text{DMSO-}d_6$ .

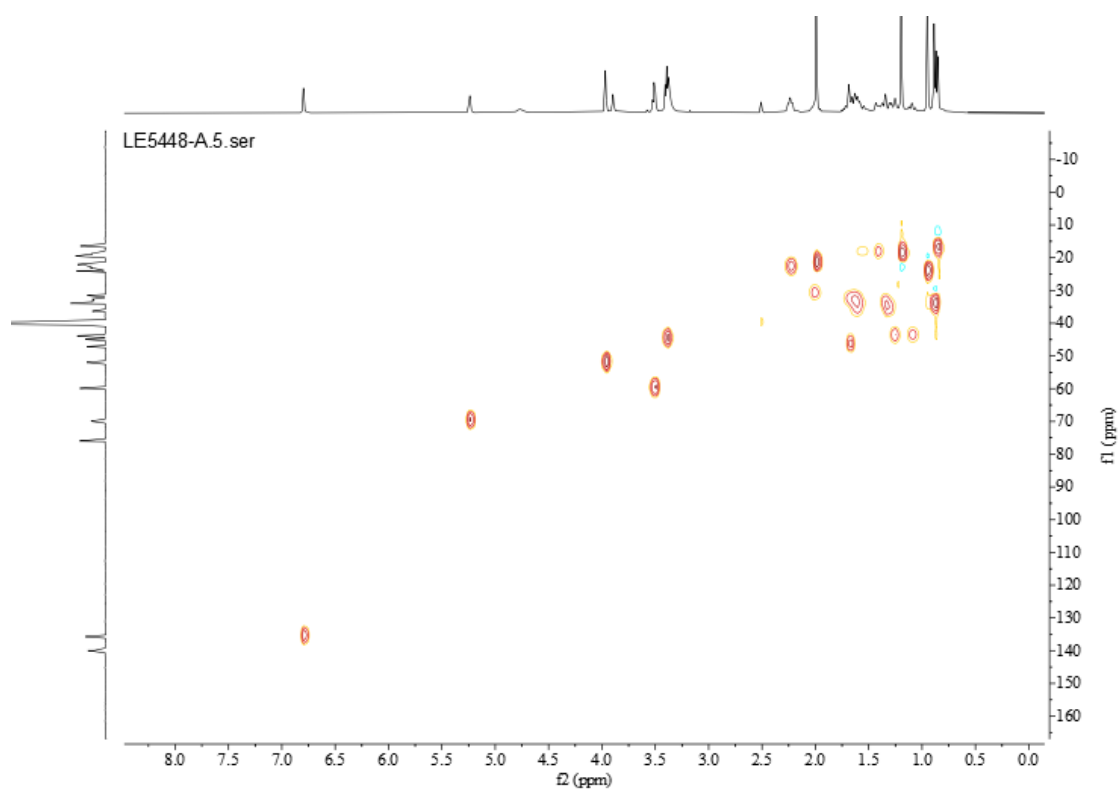

**Figure S15** The HSQC Spectrum of Compound **2** in DMSO- $d_6$ .

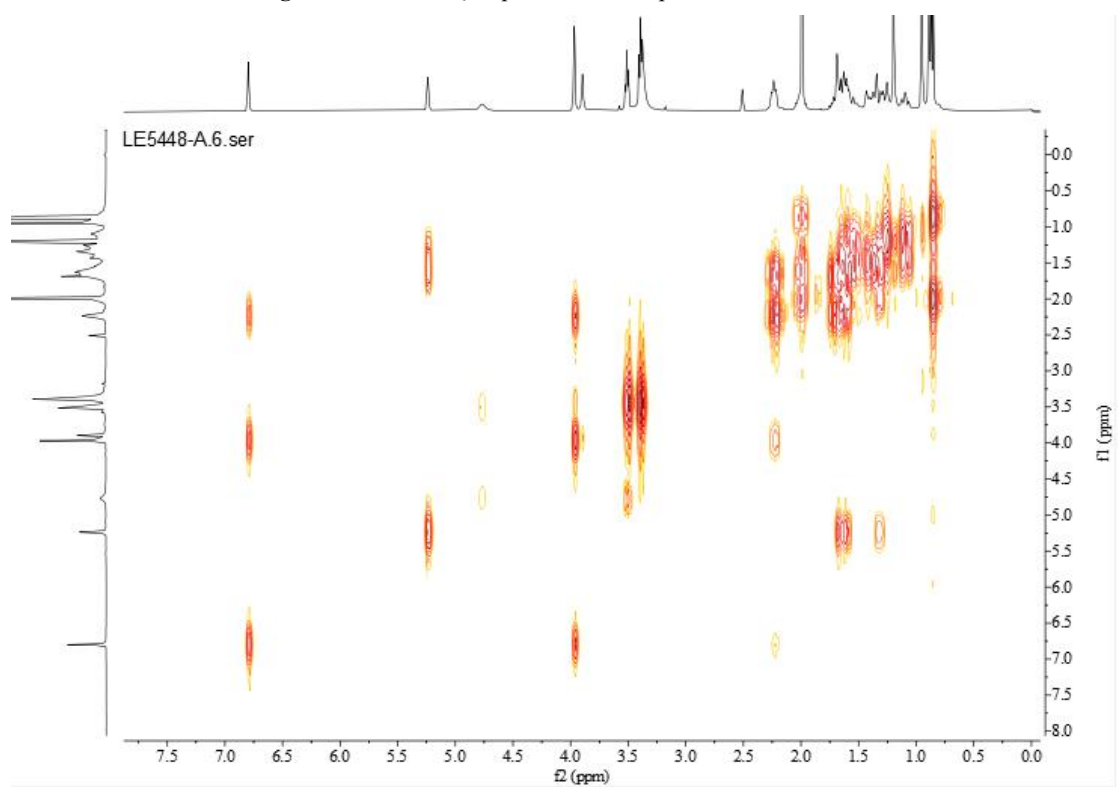

**Figure S16** The  $^1\text{H}$ - $^1\text{H}$  COSY Spectrum of Compound **2** in DMSO- $d_6$ .

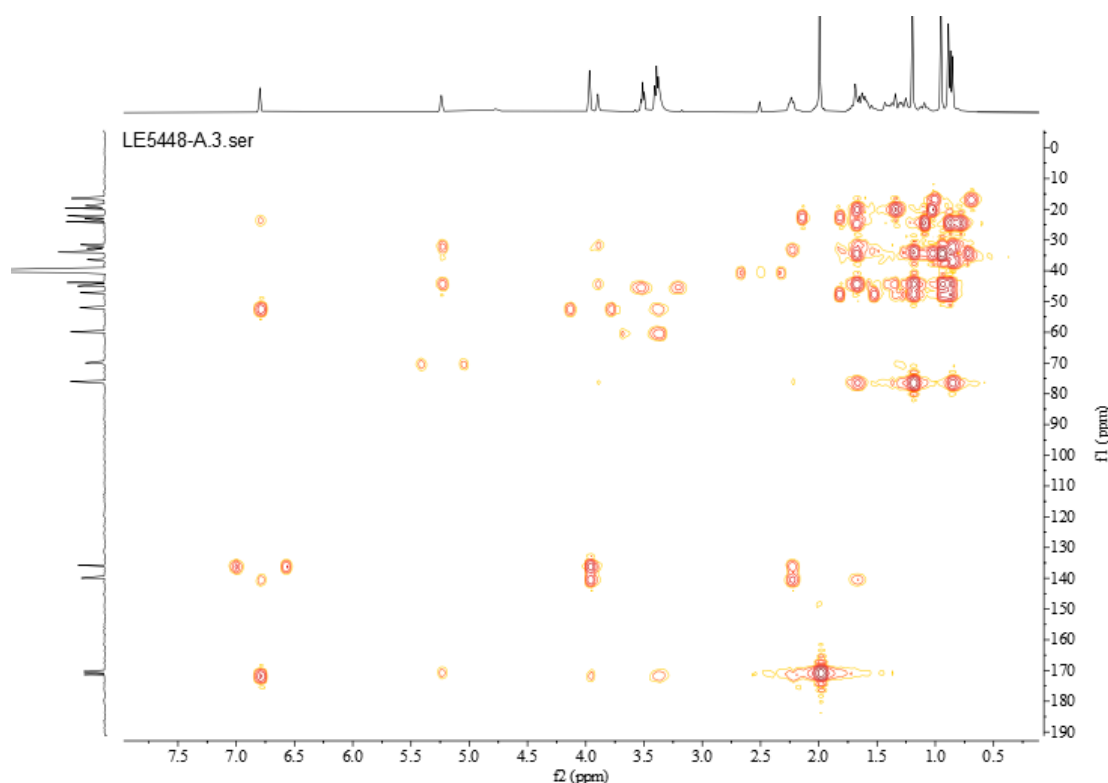

**Figure S17** The HMBC Spectrum of Compound **2** in DMSO-*d*<sub>6</sub>.

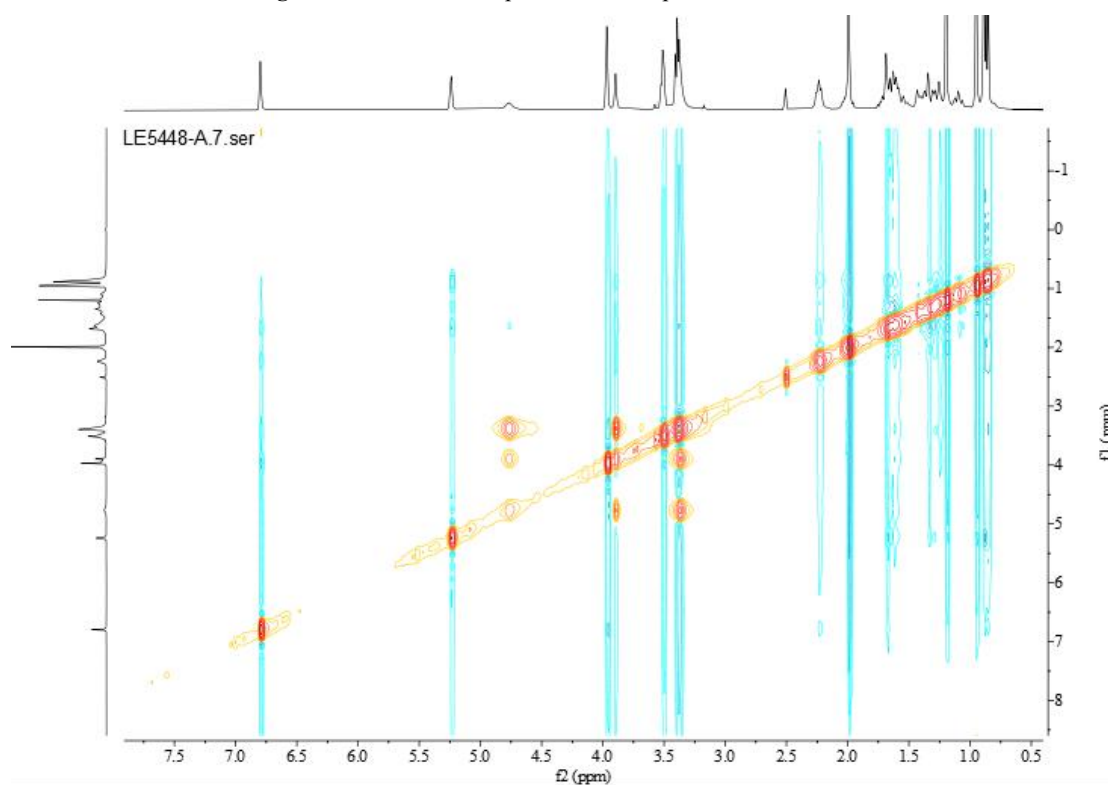

**Figure S18** The NOESY Spectrum of Compound **2** in DMSO-*d*<sub>6</sub>.

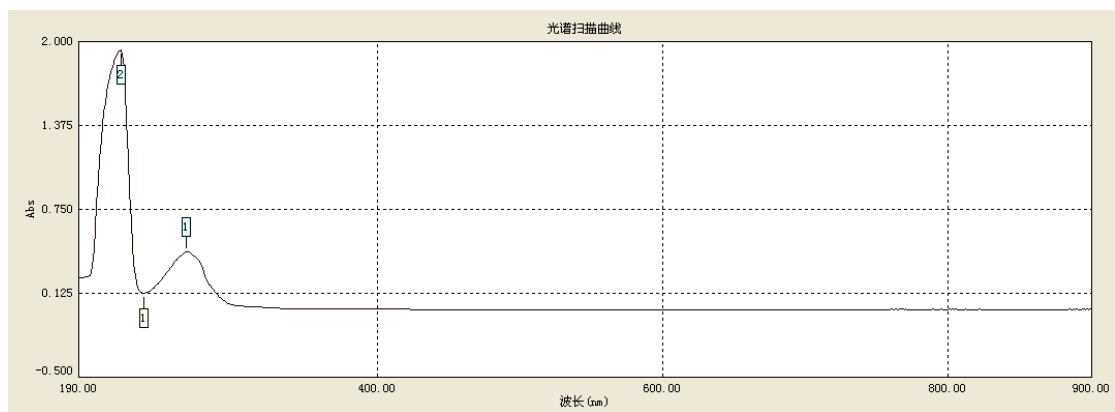

**Figure S19** The UV Spectrum of Compound **3**.

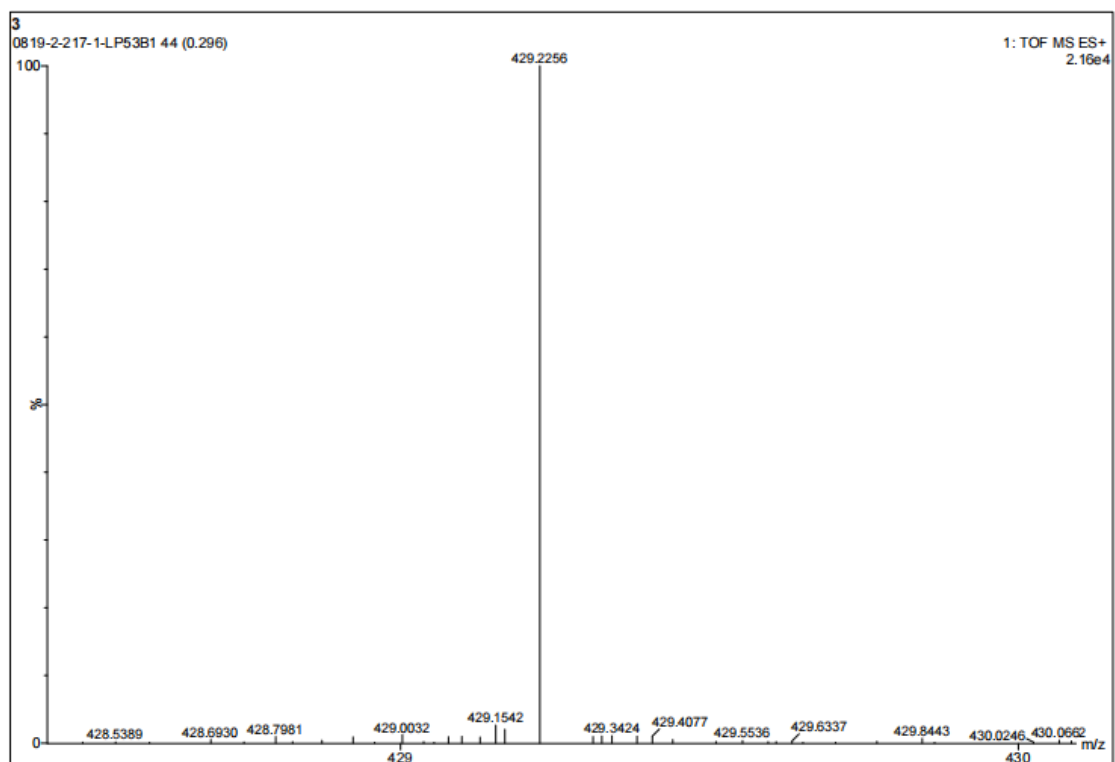

**Figure S20** The (+)-HRMS(ESI) Spectroscopic Data of Compound **3**.

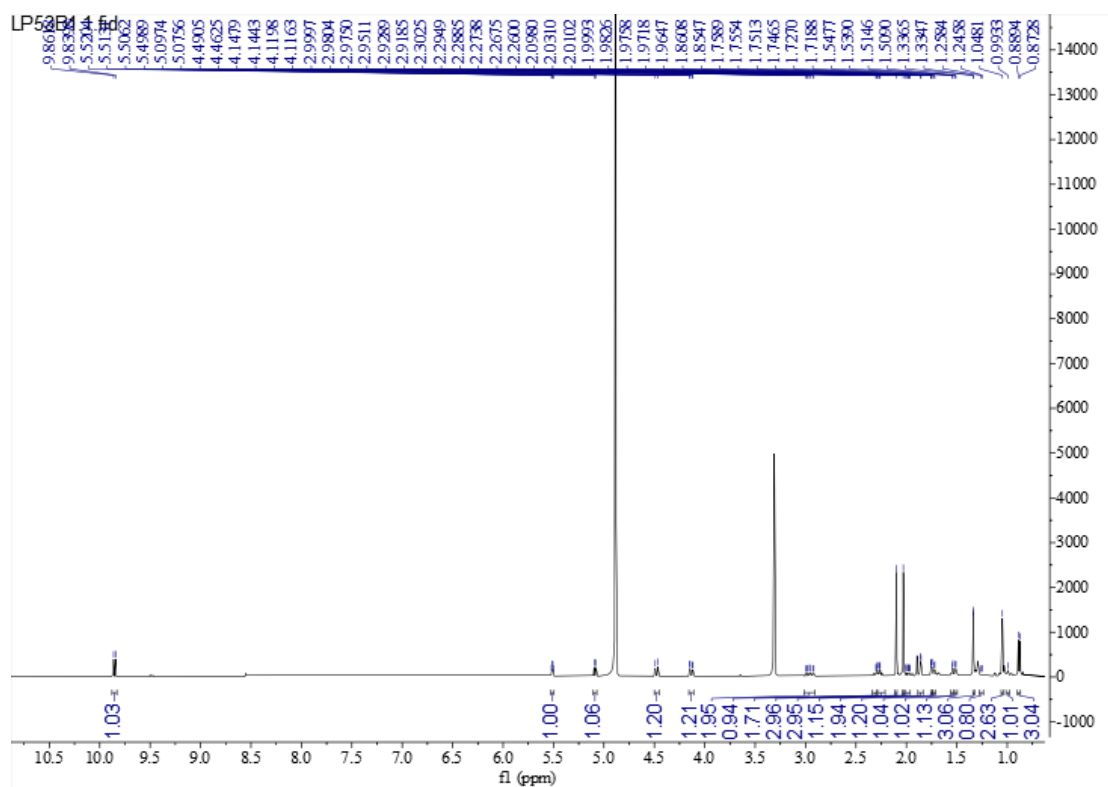

Figure S21 The  $^1\text{H}$  NMR Spectrum of Compound **3** in  $\text{CD}_3\text{OD}$ .

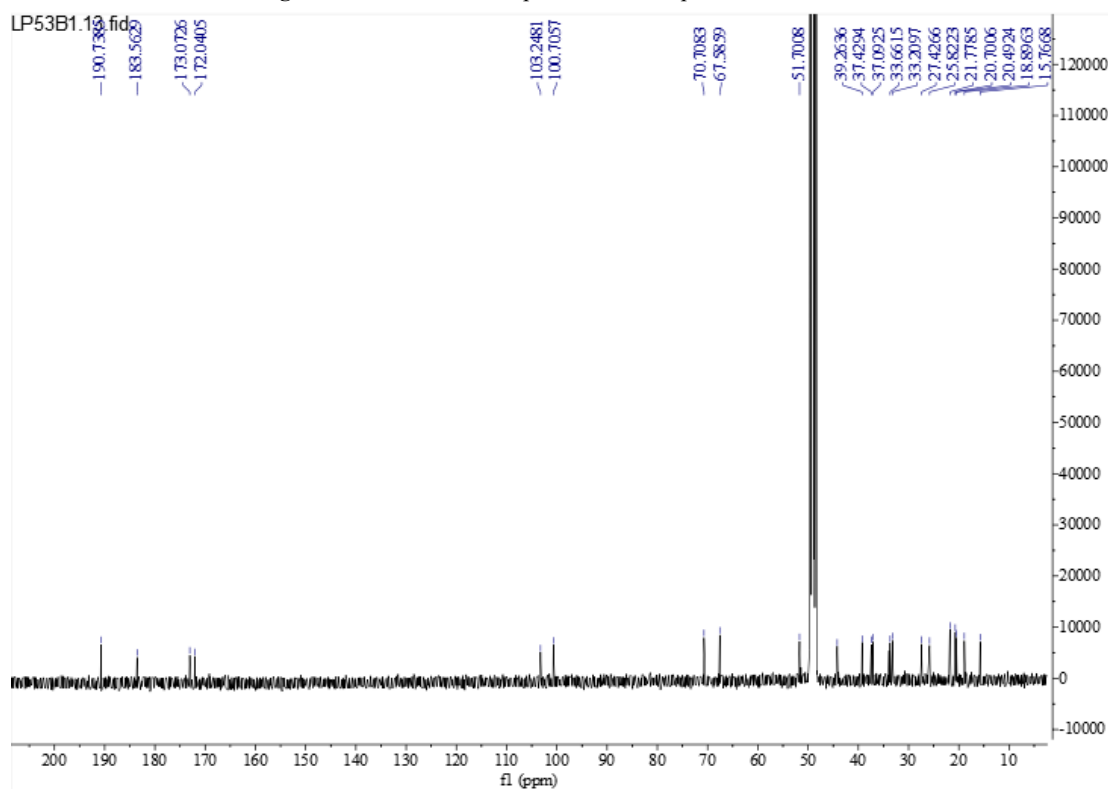

Figure S22 The  $^{13}\text{C}$  NMR Spectrum of Compound **3** in  $\text{CD}_3\text{OD}$ .



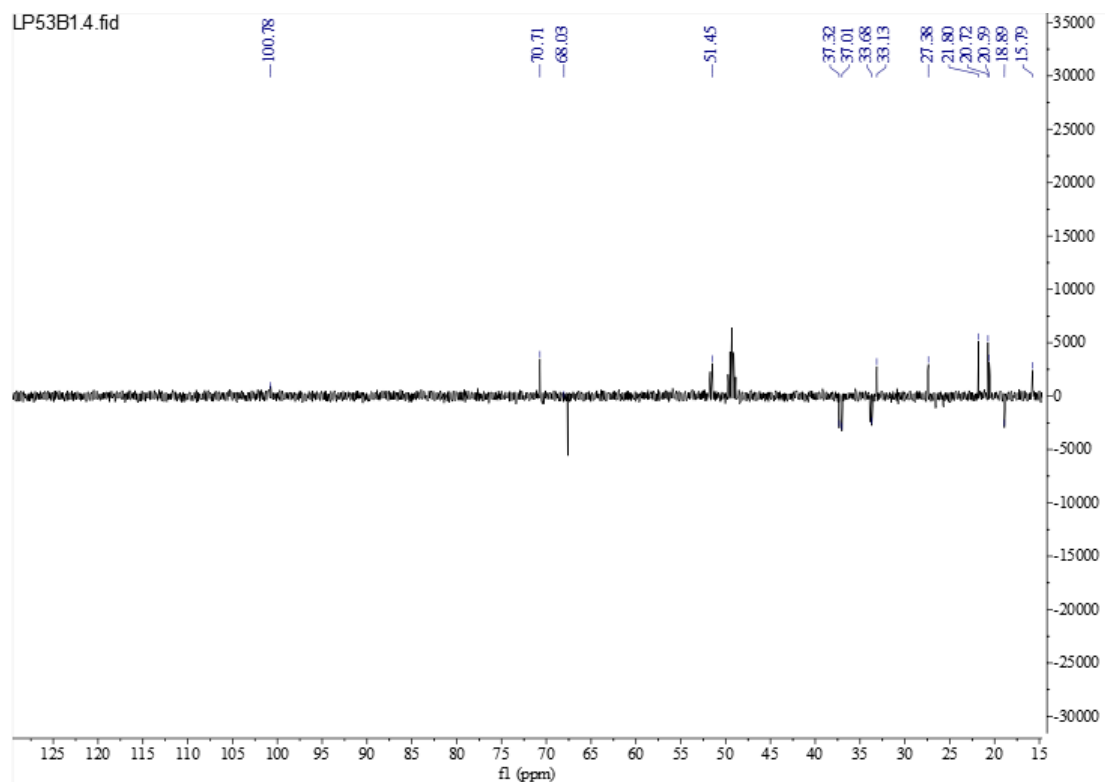

**Figure S23** The DEPT Spectrum of Compound **3** in CD<sub>3</sub>OD.

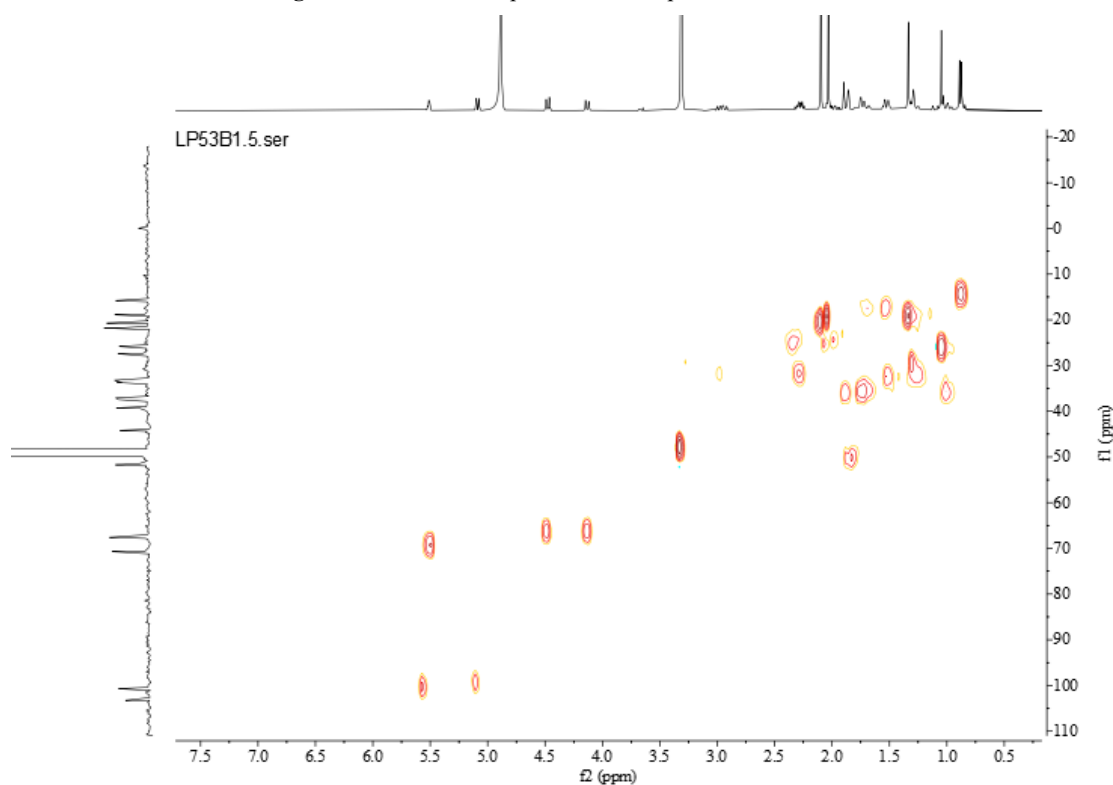

**Figure S24** The HSQC Spectrum of Compound **3** in CD<sub>3</sub>OD.

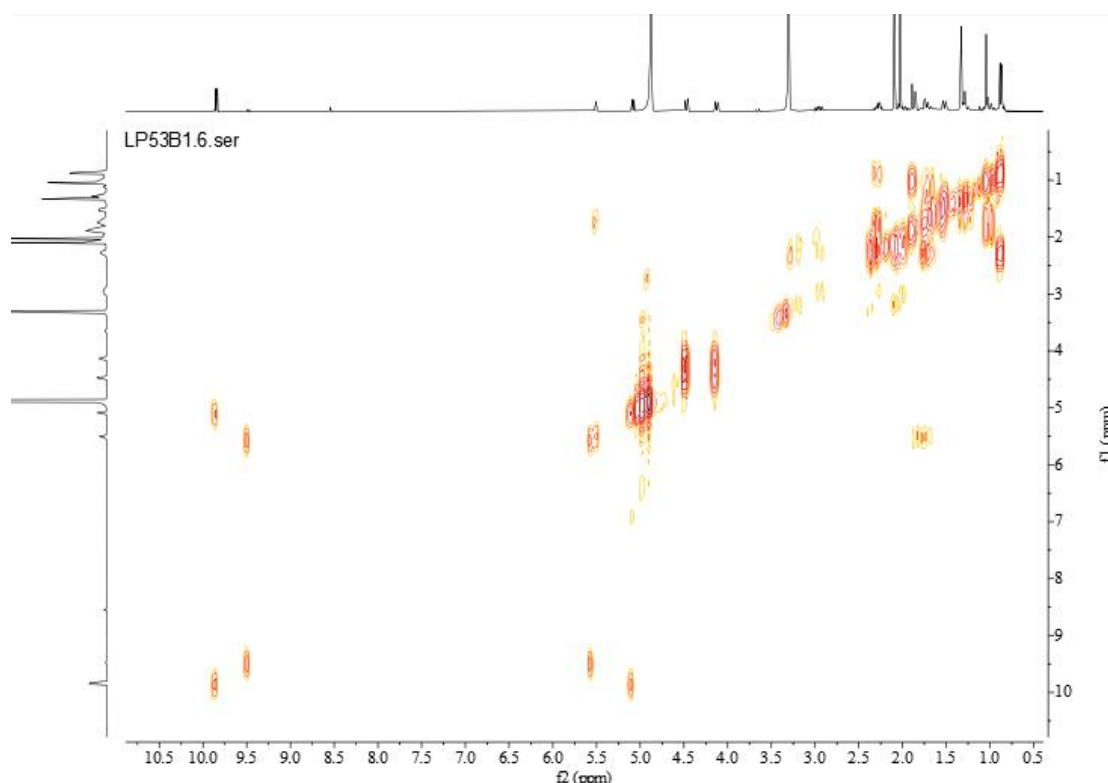

**Figure S25** The  $^1\text{H}$ - $^1\text{H}$  COSY Spectrum of Compound **3** in  $\text{CD}_3\text{OD}$ .

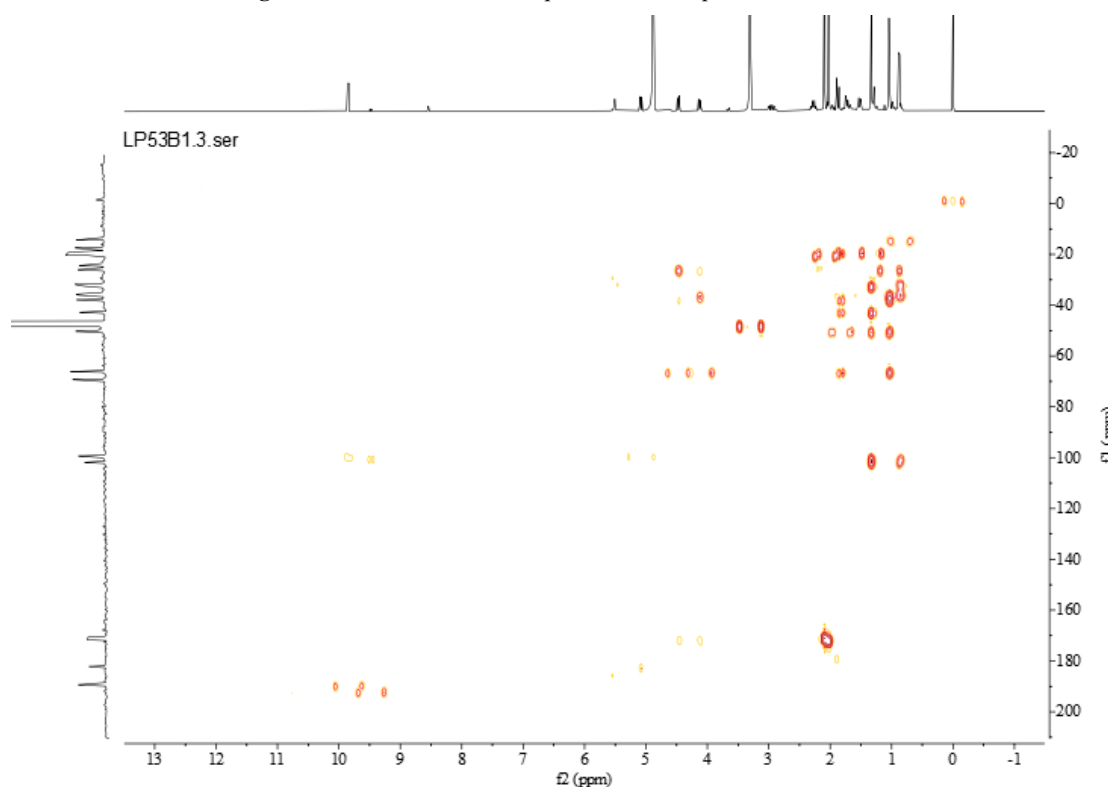

**Figure S26** The HMBC Spectrum of Compound **3** in  $\text{CD}_3\text{OD}$ .

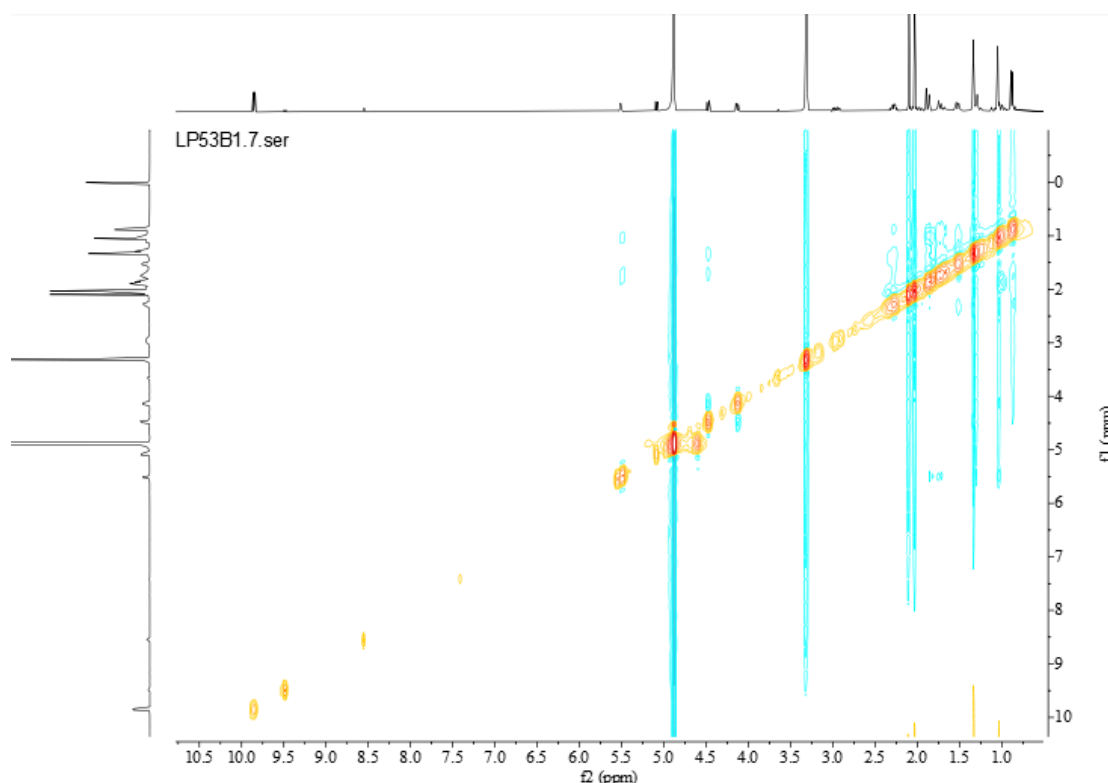

**Figure S27** The NOESY Spectrum of Compound **3** in CD<sub>3</sub>OD.

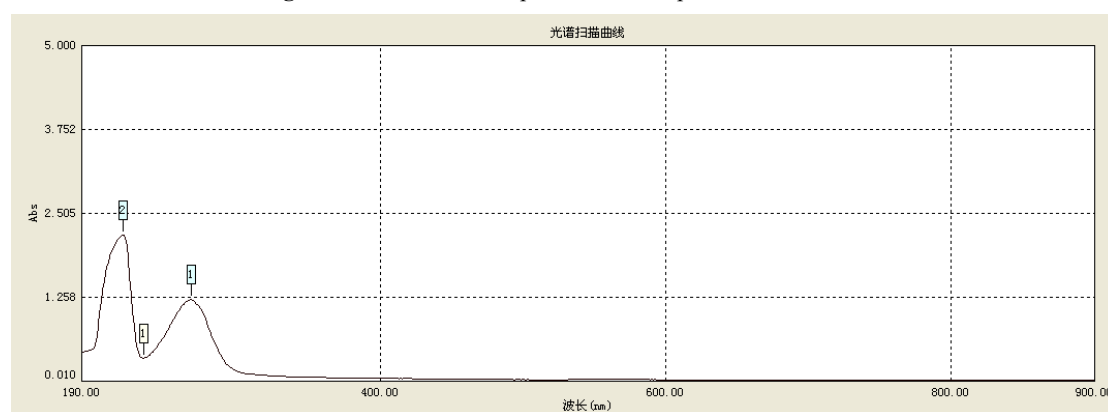

**Figure S28** The UV Spectrum of Compound **4**.

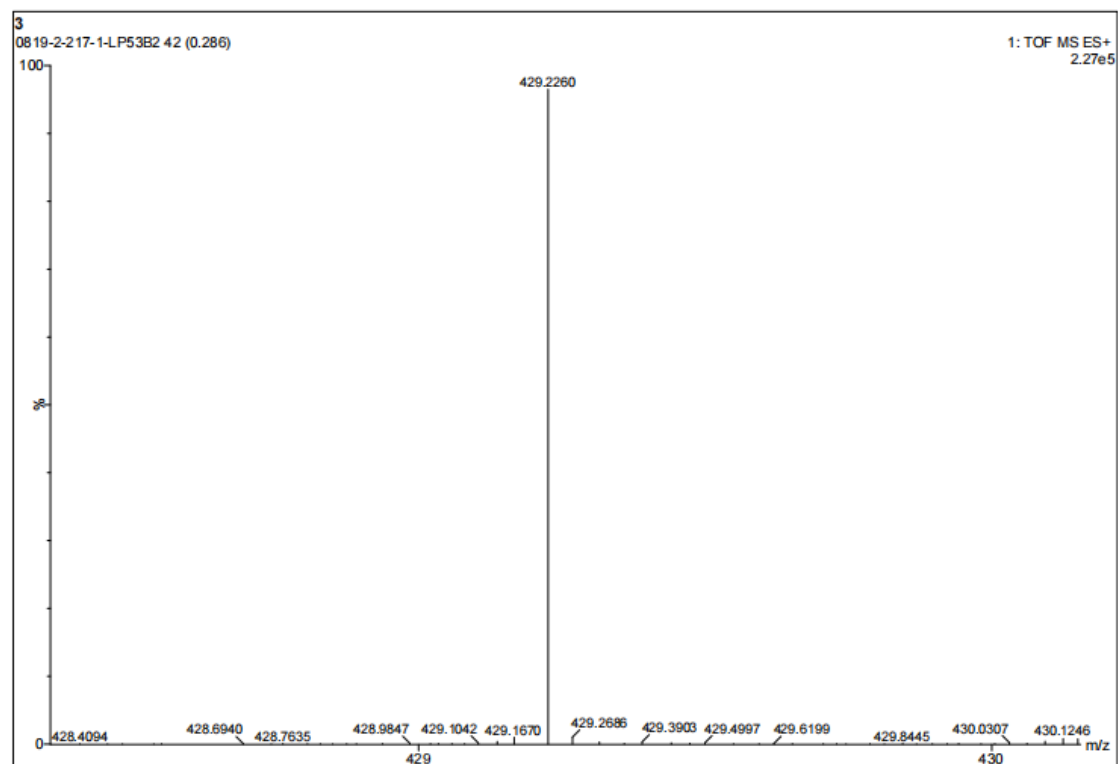

Figure S29 The (+)-HRMS(ESI) Spectroscopic Data of Compound 4.

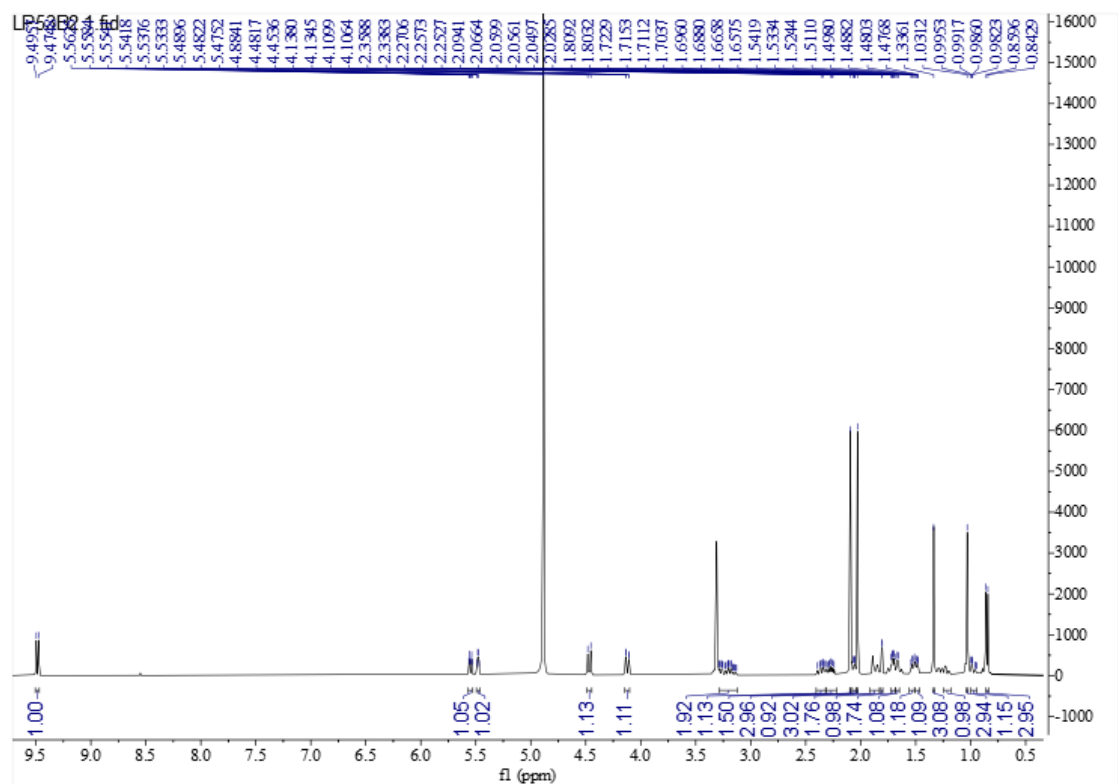

Figure S30 The  $^1\text{H}$  NMR Spectrum of Compound 4 in  $\text{CD}_3\text{OD}$ .

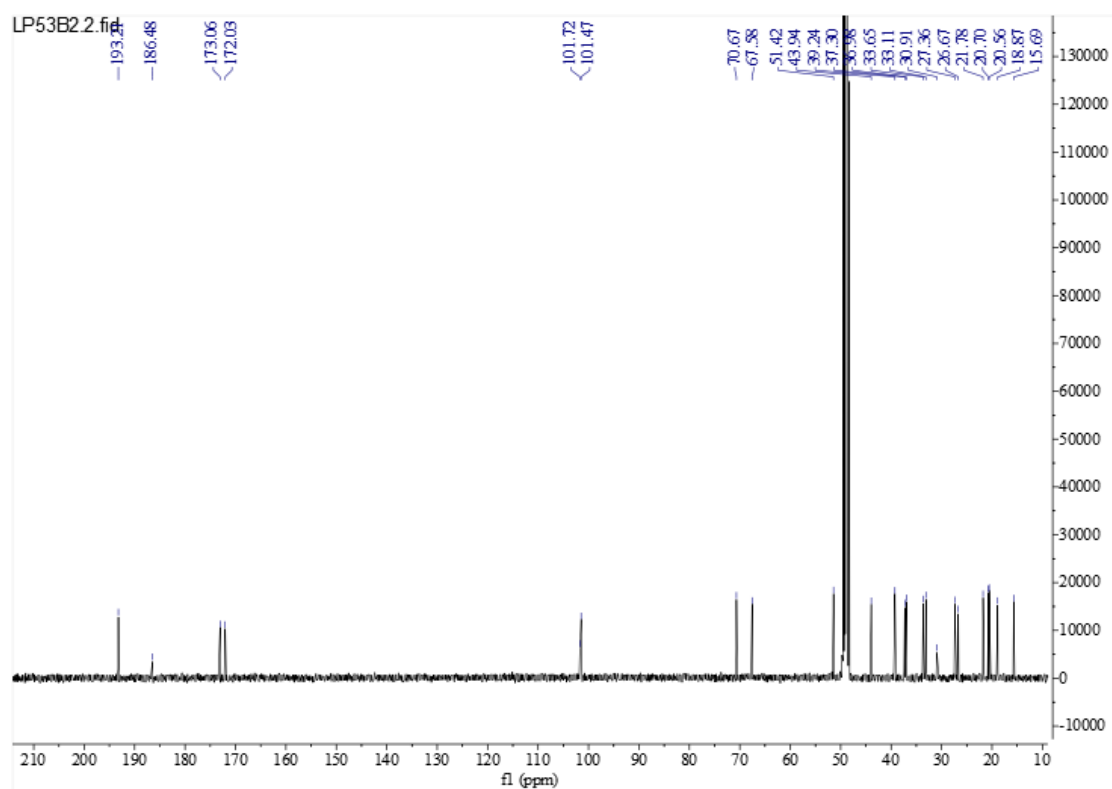

Figure S31 The  $^{13}\text{C}$  NMR Spectrum of Compound 4 in  $\text{CD}_3\text{OD}$ .

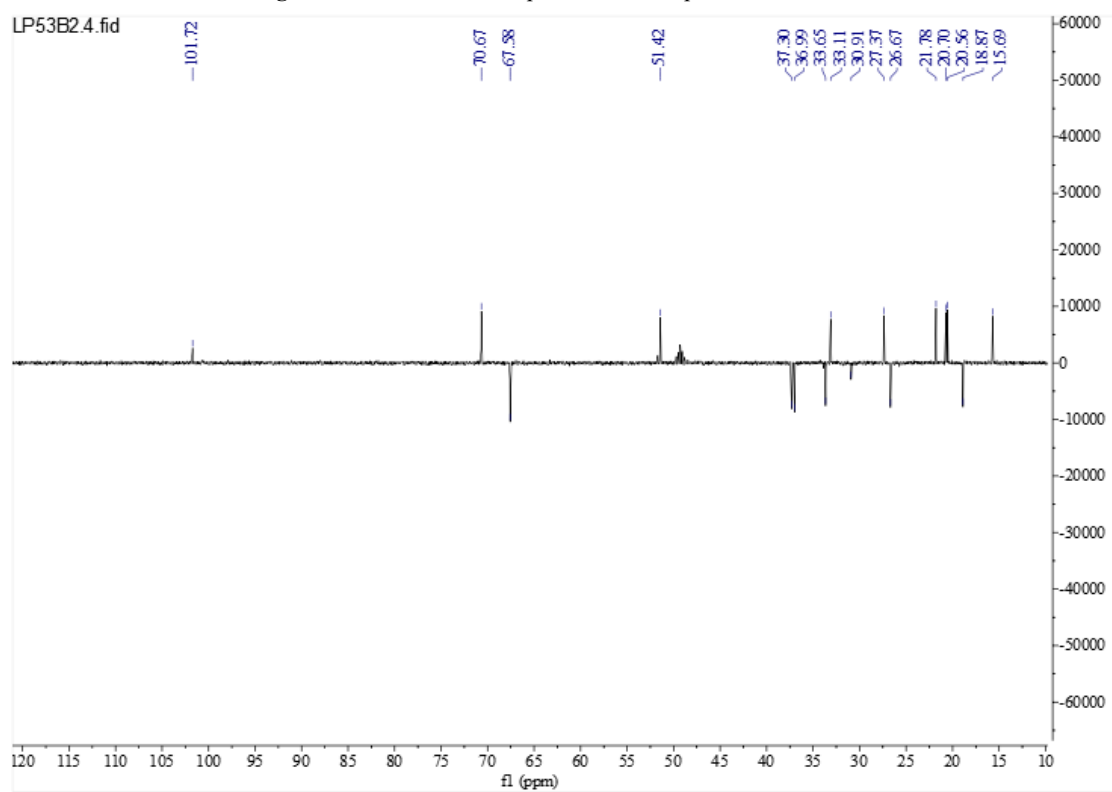

Figure S32 The DEPT Spectrum of Compound 4 in  $\text{CD}_3\text{OD}$ .

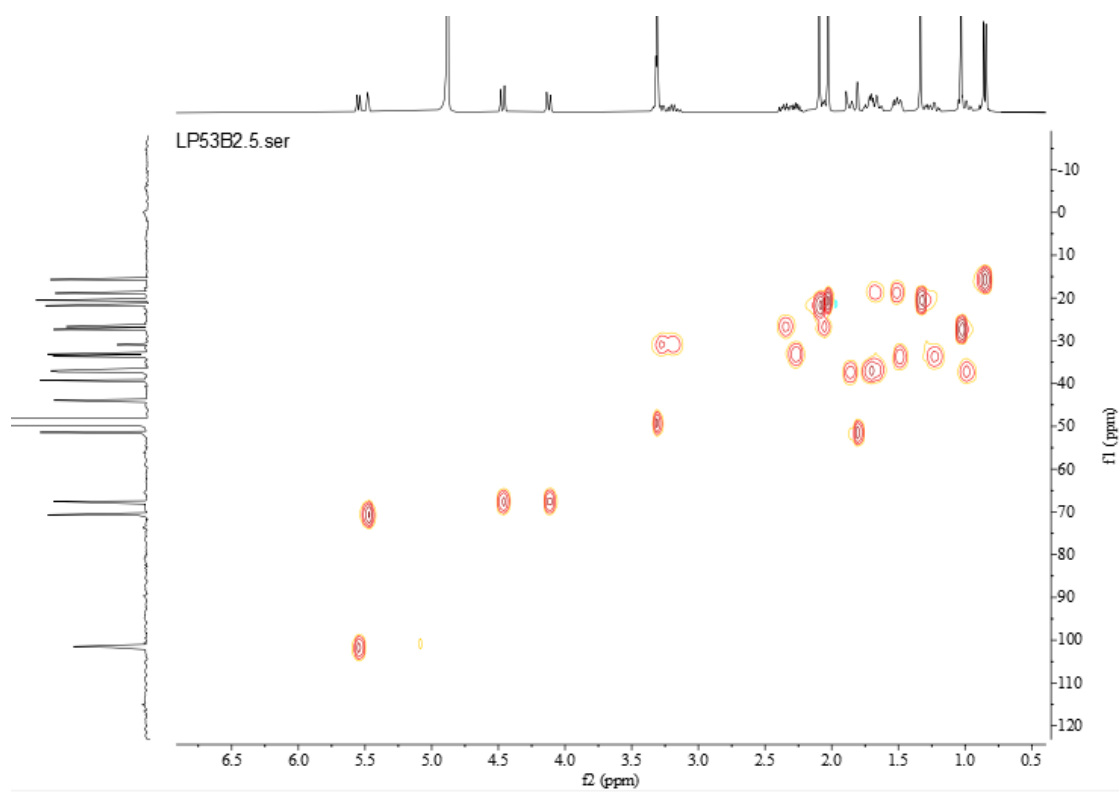

**Figure S33** The HSQC Spectrum of Compound 4 in CD<sub>3</sub>OD.

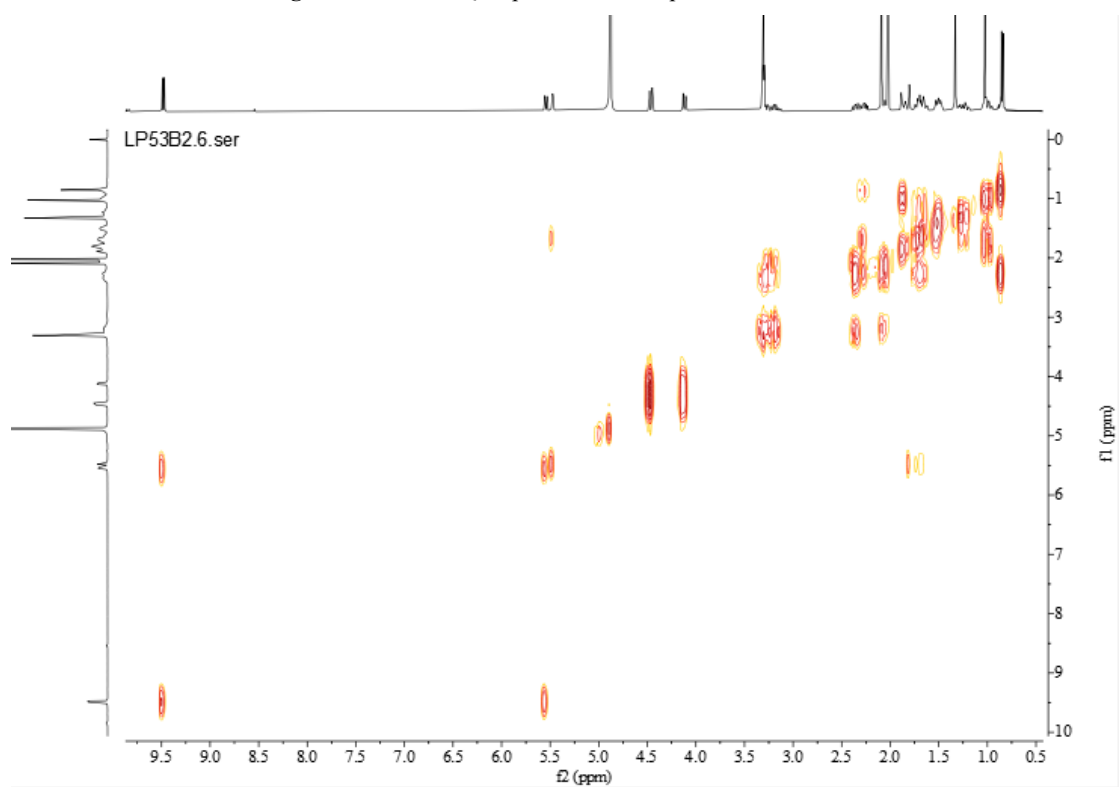

**Figure S34** The <sup>1</sup>H-<sup>1</sup>H COSY Spectrum of Compound 4 in CD<sub>3</sub>OD.

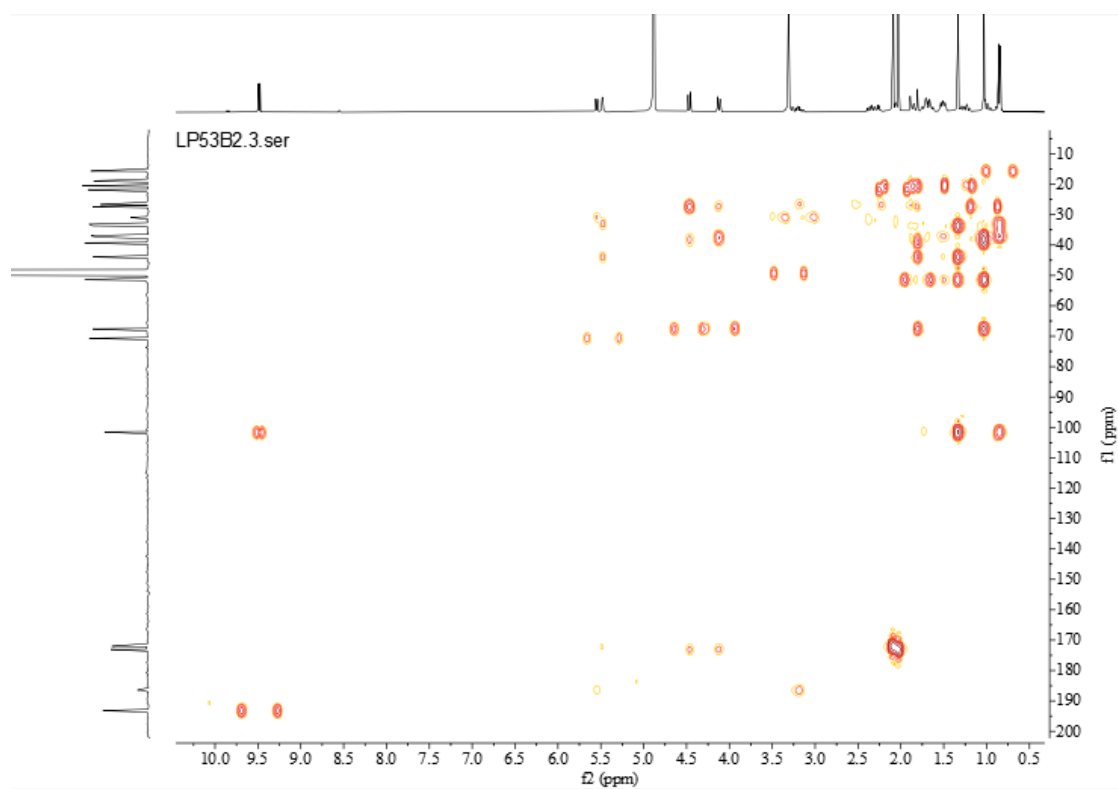

**Figure S35** The HMBC Spectrum of Compound **4** in CD<sub>3</sub>OD.

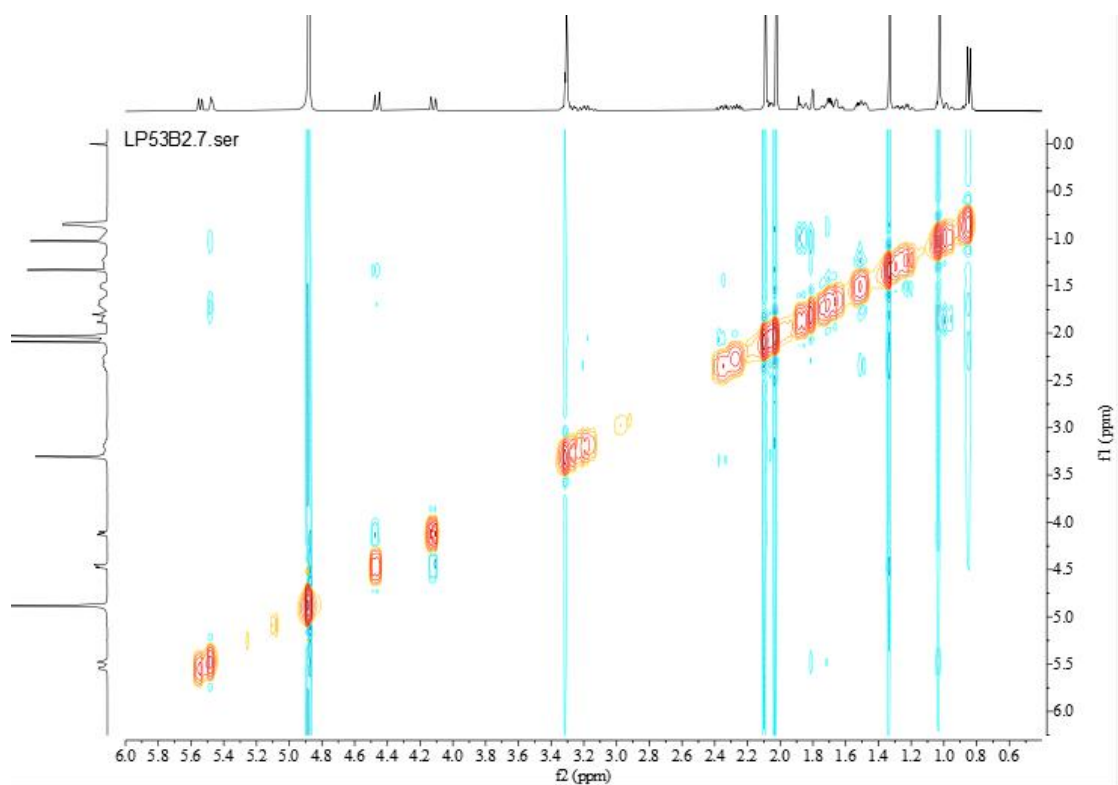

**Figure S36** The NOESY Spectrum of Compound **4** in CD<sub>3</sub>OD.
